# Supplementary material for: Efficient cross-trait penalized regression increases prediction accuracy in large cohorts using secondary phenotypes
Source: PubMed Central journal article supplement (PMC6361917; doi:10.1038/s41467-019-08535-0), 2019-02-04
Supplement: 41467_2019_8535_MOESM1_ESM.pdf [file 41467_2019_8535_MOESM1_ESM.pdf]

**Supplementary Information**

**Efficient Cross-Trait Penalized Regression Increases Prediction Accuracy in Large Cohorts using Secondary Phenotypes**

Wonil Chung et al.

Supplementary Figure 1. Effects of number of causal SNPs (per-SNP heritability) on prediction accuracy. We set 2 traits, 14,800 training samples, 5,000 SNPs, 50% heritability.

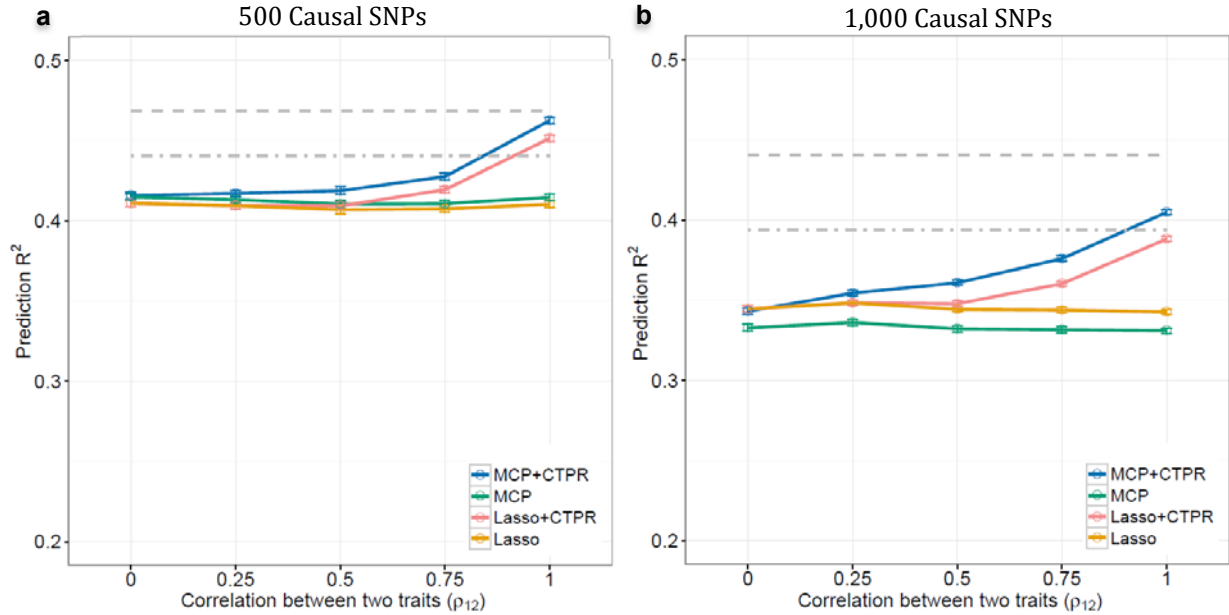

For more detailed evaluation of our methods, we used individual-level genotype data for all traits with a smaller number of SNPs and repeated 100 times for each scenario. We sampled 14,800 individuals from the NHS/HPFS/PHS cohort data for a training set, 5,900 individuals for a validation set with randomly selected 5,000 SNPs that are all common and in low LD. We simulated two phenotypes with 500 causal SNPs. All error bars represent standard errors of prediction  $R^2$ .

**(a)** We first considered the scenarios with 14,800 training samples (7,400 for the primary trait and the other 7,400 for the secondary trait), 5,000 SNPs and 500 causal SNPs. We set trait-heritability for both traits to 50% and ranged the genetic correlation between two traits from 0 to 1. As mentioned in the manuscript, increase in genetic correlation between two traits led to a gain in PA of multi-trait methods in terms of prediction  $R^2$  but the MCP+CTPR performed better than the Lasso+CTPR. It is reverse as compared to the simulation in Figure 2 because this simulation data had a relatively large SNP effects and the MCP+CTPR generally imposes less penalty on large SNP effects than the Lasso+CTPR. Based on recent population genetics studies<sup>1,2</sup>, we estimated two theoretical upper bounds of PA for single-trait and multi-trait approaches assuming a genetic correlation of 1 (displayed in grey). Two grey lines represent theoretical upper bound of prediction accuracy for single-trait (lower) and multi-trait approaches (upper). The expected value of prediction  $R^2$  for  $k$ th trait is as  $E[R^2(y_k, \hat{y}_k)] \approx h_k^2 \text{var}(g_k) / [\text{var}(g_k) + C \cdot \frac{\text{var}(y_k)}{N}] = h_k^2 / [1 + C/h_k^2 N]$  where  $h_k^2$  is the trait-heritability,  $g_k$  is the additive genetic values,  $y_k$  and  $\hat{y}_k$  are true and predicted phenotype values for  $k$ th trait, and  $C$  is the number of causal SNPs (Note: this theoretical upper bound of prediction accuracy is achievable if and only if the causal SNPs are used in the prediction model. When causal SNPs are not known a priori, the theoretical upper bound could be lower). Since multi-trait methods used twice as many samples as single-trait methods, the upper bound of PA for multi-trait is

larger than that for single-trait. The difference between theoretical PA and observed PA is large with low genetic correlation between two traits but becomes smaller as the genetic correlation increases.

**(b)** We next considered the scenarios with 14,800 training samples (7,400 for the primary trait and the other 7,400 for the secondary trait), 5,000 SNPs and 1,000 causal SNPs. “Per-SNP heritability”, or the average proportion of phenotypic variance explained by a single SNP, decreases as the number of causal SNPs increases while keeping trait-heritability constant. Doubling the number of causal SNPs (i.e. 1,000) which led to less per-SNP heritability. Less per-SNP heritability resulted in less PA because SNPs associated weakly with the trait tended to be estimated less accurately by the prediction models, which reduced the PA. The smaller per-SNP heritability, the larger relative gain in PA by the multi-trait methods. For example, with 5,000 SNPs, 14,800 samples and 500 causal SNPs, the gain in PA of the multi-trait approach is 10.1% using Lasso and 11.6% using MCP but with 1,000 causal SNPs, the gain in PA is 13.3% using Lasso and 22.2% using MCP (Supplementary Table 2).

Supplementary Figure 2. Effects of proportion of shared causal SNPs on prediction accuracy. We set 2 traits, 14,800 training samples, 5,000 SNPs, 500 casual SNPs, 50% heritability and varied the proportion of shared causal SNPs from 0 to 1 with genetic correlation  $\rho_{12} = 0.1, 0.5, 0.7$  or  $0.9$ .

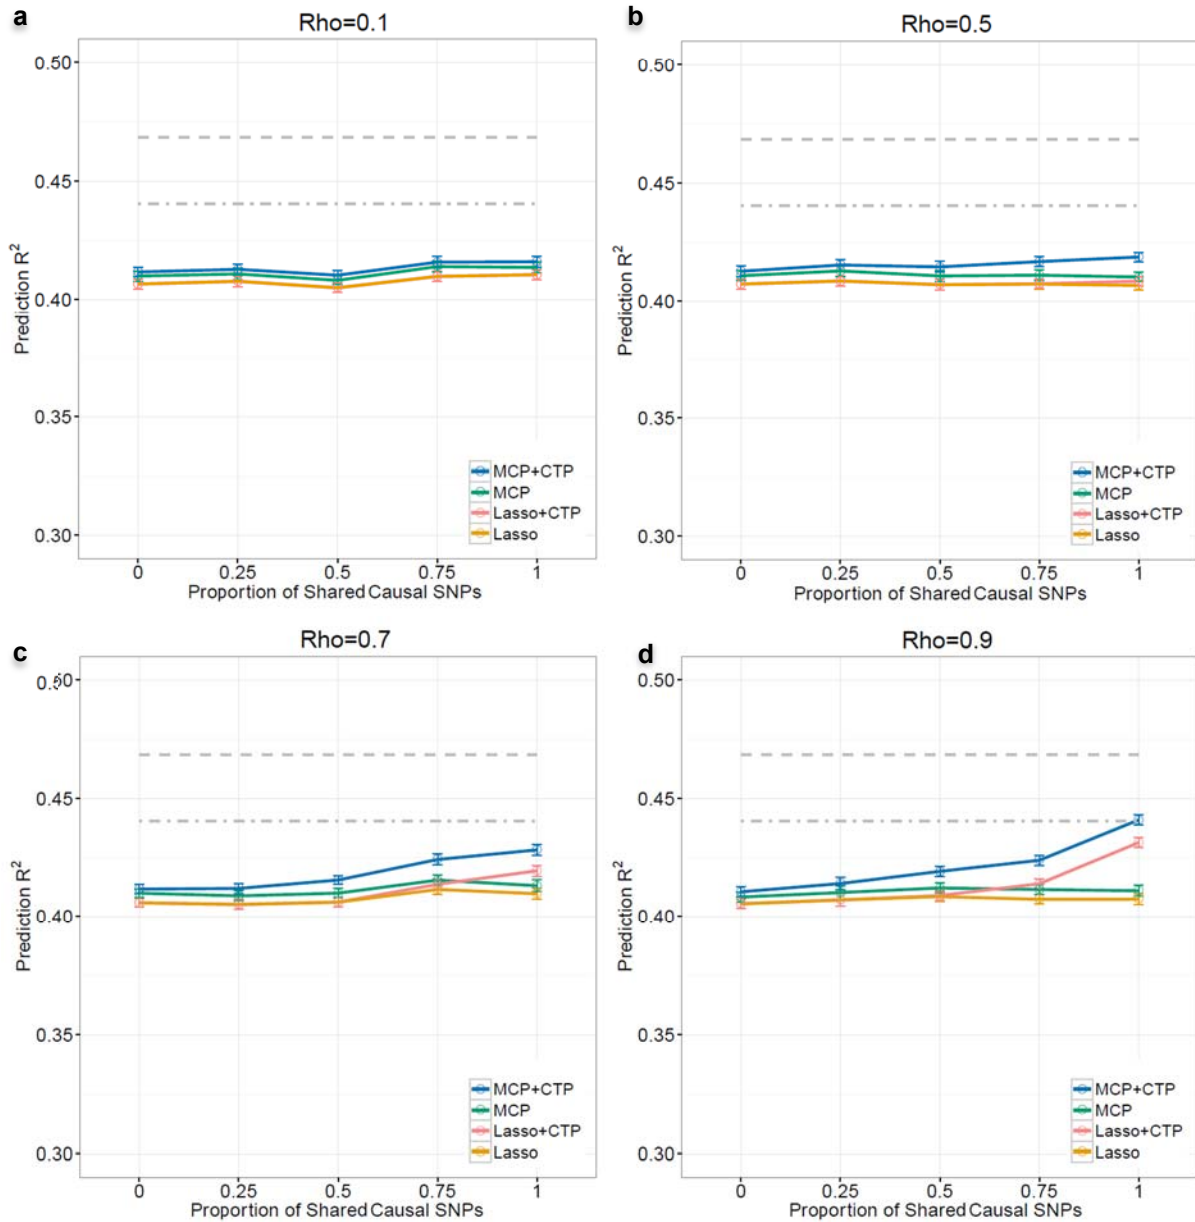

We varied the proportion of shared causal SNPs between two traits using the same simulation setting as for Figure S1a in order to mimic more realistic situations. All error bars represent standard errors of prediction  $R^2$ .

**(a)** Assuming a genetic correlation among the shared causal SNPs of 0.1, there was no apparent gain in PA using multi-trait methods.

**(b) (c) (d)** As genetic correlation increased to 0.5, 0.7 or 0.9, the improvement in PA at higher proportion of shared causal SNPs among traits became more obvious (Supplementary Table 3).

Supplementary Figure 3. Effects of trait-heritability for primary and secondary traits on prediction accuracy. We set 2 traits, 14,800 training samples, 5,000 SNPs, 500 casual SNPs and varied trait-heritability to  $h^2=(h_1^2, h_2^2)=(50\%,25\%), (50\%,75\%), (25\%,25\%)$  or  $(75\%,75\%)$  where  $h_k^2$  is the pre-set heritability for the  $k$ th trait.

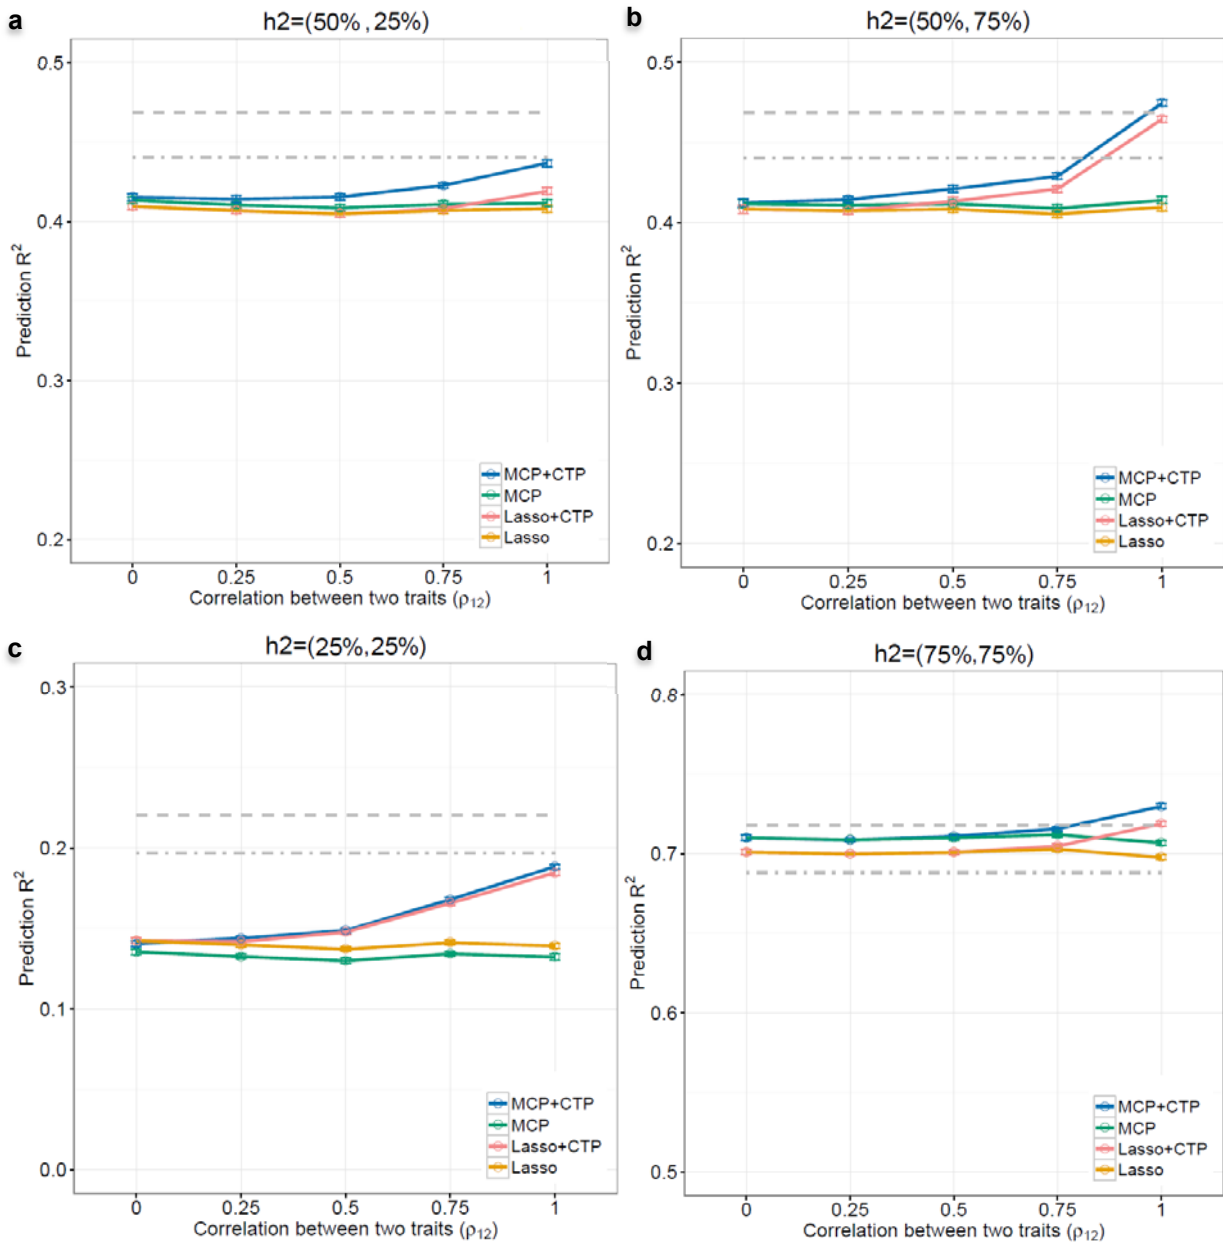

To demonstrate the effect of trait-heritability on PA, we considered the setting where the training sample size, the number of SNPs and the number of causal SNPs were 14,800, 5,000 and 500, respectively. All error bars represent standard errors of prediction  $R^2$ .

(a) (b) Compared to the previous settings with 50% heritability for both traits in Figure S1a, we changed the heritability of the secondary trait to 25% or 75%. While the PA of the single-trait approaches were 0.407 for Lasso and 0.411 for MCP, the PA of the multi-trait methods were 0.408, 0.423 with the heritability of 25% for the secondary trait but 0.421, 0.429 with the heritability of 75% and genetic correlation=0.75 (Supplementary Table 4). The results showed

that larger heritability for secondary traits help PA of the primary trait even if the genetic correlation between traits remains the same.

**(c) (d)** We examined the heritability of 25% or 75% for both traits. While overall patterns were quite similar to the results with the heritability of 50%, the PA of single-trait methods and multi-trait methods ranged between 0.137 and 0.188 with a heritability of 25% and between 0.699 and 0.730 with a heritability of 75% (Supplementary Table 4). The results showed that larger trait-heritability of both traits helps PA of the primary trait.

Supplementary Figure 4. Effects of number of traits on prediction accuracy. We simulated multiple phenotypes, each with 2,000 training samples, 5,000 SNPs, 500 casual SNPs, 50% heritability and varied number of trait from 2 to 7 with genetic correlation  $\rho_{ij}=0.1, 0.5, 0.7$  or  $0.9$  ( $i \neq j, i = 1, j = 1$ ),  $\rho_{1i} = \rho_{i1} = 0.5$ .

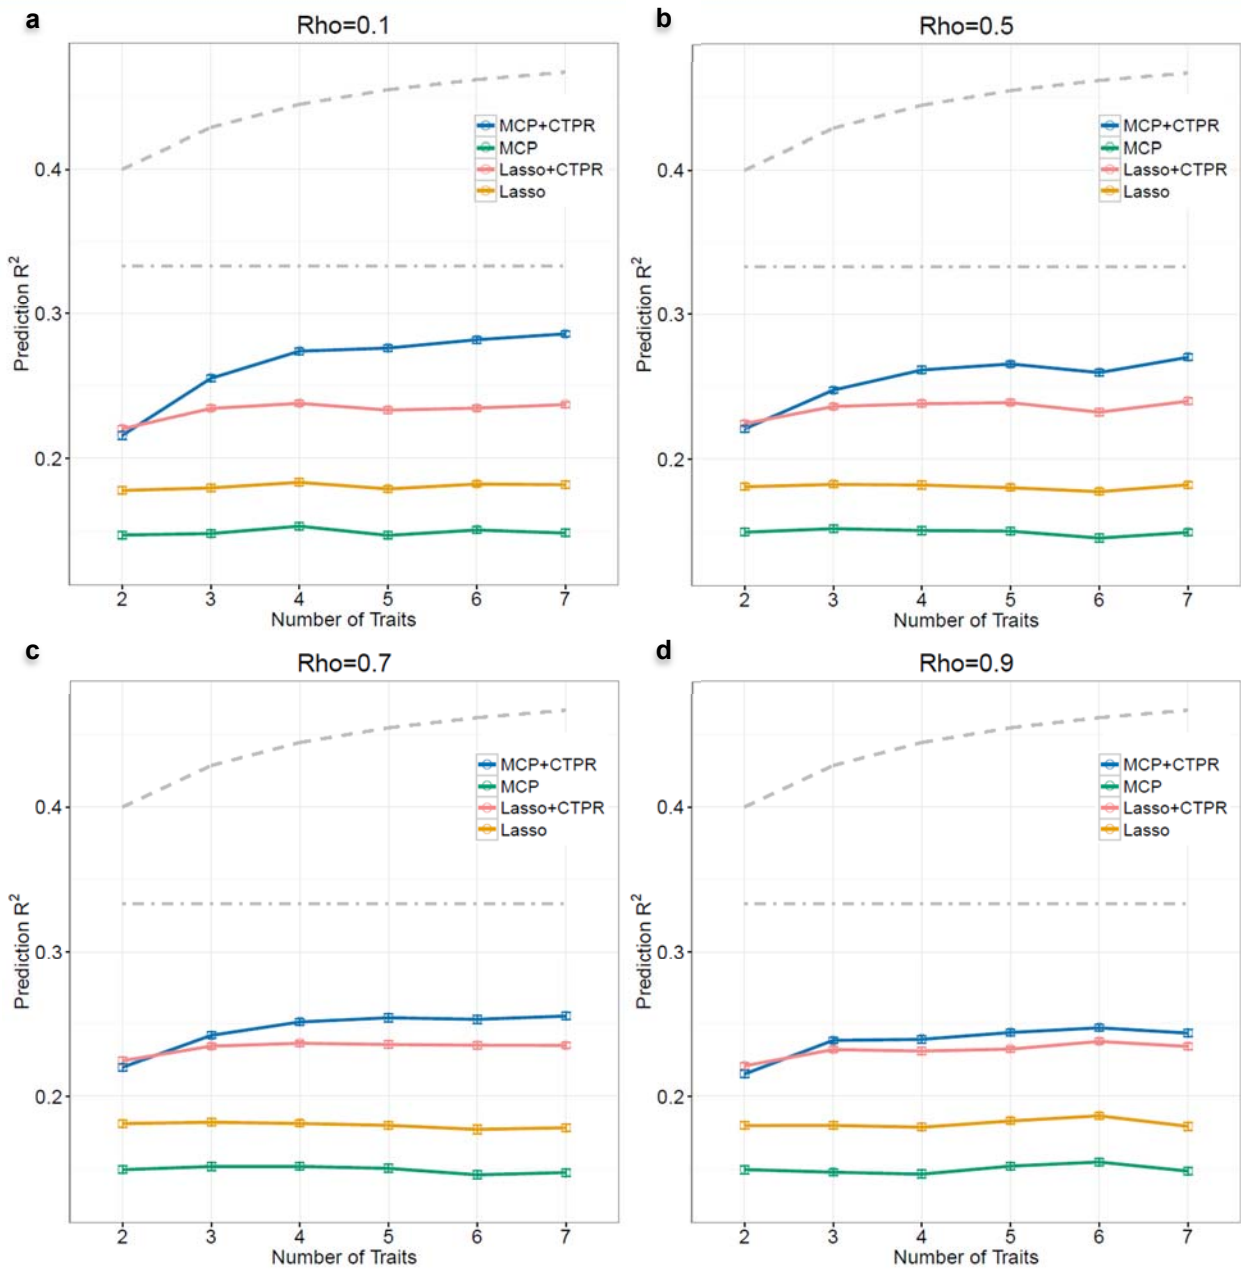

To assess the effect of number of secondary traits on PA of the primary trait, we simulated multiple phenotypes, each with 2,000 samples. The genetic correlation between the primary trait and each of the secondary trait was fixed to 0.5 and the genetic correlation among secondary traits varied from 0.1 to 0.9. We evaluated how the number of secondary traits and genetic correlation among secondary traits would affect the PA for the primary trait. All error bars represent standard errors of prediction  $R^2$ .

**(a) (b) (c) (d)** With a genetic correlation of 0.1 among secondary traits, the PA was 0.220 (MCP+CTPR) when including two traits and 0.286 for seven traits. The PA increased as more



traits were included. With a genetic correlation of 0.9 among secondary traits, the PA was 0.220 (MCP+CTPR) for two traits and 0.244 for seven traits (Supplementary Table 5). The results showed that including more secondary traits that were less genetically correlated with each other would increase the PA for the primary trait.

Supplementary Figure 5. Comparisons of the prediction accuracy of the proposed methods (MCP+CTPR, Lasso+CTPR ) using individual-level genotypes, true coefficients and summary statistics.

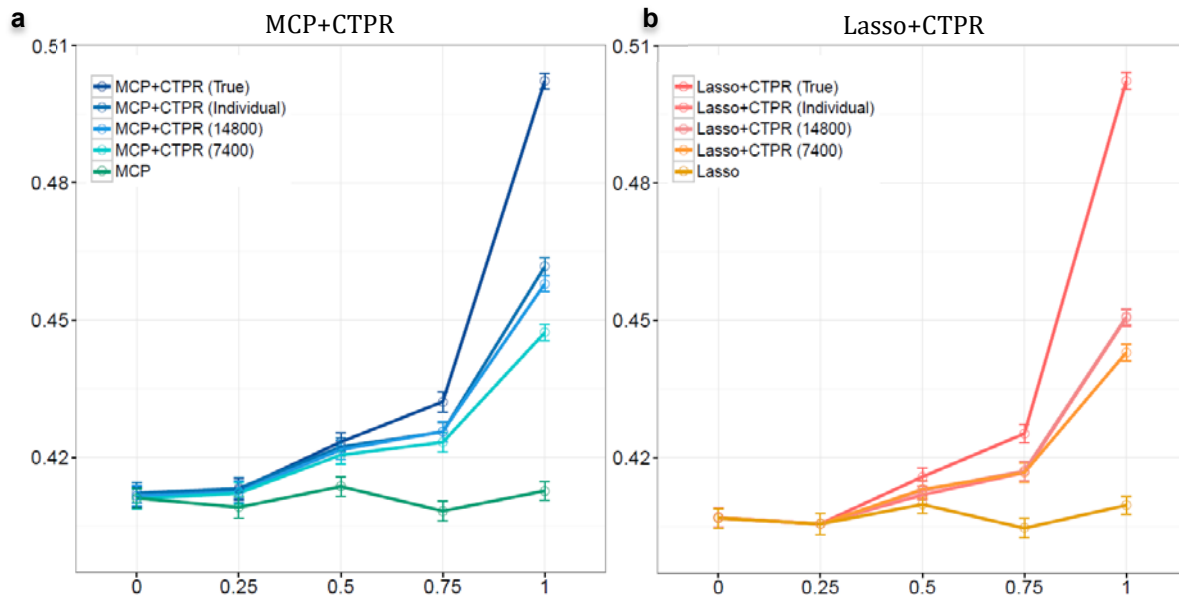

To utilize summary statistics from published GWAS results for improving PA of the primary trait, we implemented a novel cross-trait penalty function that can exploit fixed SNP effects of the secondary trait and evaluated its performance systematically using simulations. For the secondary trait, we used true SNP effects as well as estimated SNP effects via single SNP linear regression based on 7,400 and 14,800 samples, respectively. The prediction  $R^2$  using three summary data (i.e. true, 7,400 and 14,800) and individual-level data were compared after averaging over 100 replications. All error bars represent standard errors of prediction  $R^2$ .

**(a) (b)** The use of true SNP coefficients for the secondary trait produced the best PA across all genetic correlation settings. We also observed that individual-level data of 7,400 samples for the secondary trait gave slightly better PA than the use of summary statistics based on 14,800 and 7,400 samples. For example, at genetic correlation of 0.75, the prediction  $R^2$  using Lasso+CTPR (MCP+CTPR) was 0.425 (0.432) with true SNP effects, and 0.417 (0.426) with summary statistics based on 14,800 samples, and 0.416 (0.423) with summary statistics based on 7,400 samples (Supplementary Table 6). Since the use of true SNP effects gives the best PA and PA increases as sample size of the summary statistics increases, it would be expected that use of summary statistics from external large-scale GWAS studies could outperform use of individual-level data of the secondary trait (usually with smaller sample size). All published GWAS summary statistics for related secondary traits could then be used to improve the prediction model of the primary trait. Computational advantage using summary statistics makes it feasible to incorporate a large number of published GWAS studies in building the prediction model for the primary trait.

Abbreviations: True=true coefficients for the secondary trait, Individual= individual-level genotypes, 7400=summary statistics computed with 7,400 samples, 14,800=summary statistics computed with 14,800 samples.

Supplementary Figure 6. Performance evaluation of coordinate descent algorithm with 14,800 training samples, 5,000 SNPs and genetic correlation=0.75. (a) Plot for number of non-zero  $\hat{\beta}$  vs. number of causal SNPs. (b) Plot for  $\lambda_1$  estimates vs. number of causal SNPs. (c) Plot for  $\lambda_2$  estimates vs. genetic correlation between two traits ( $\rho_{12}$ ).

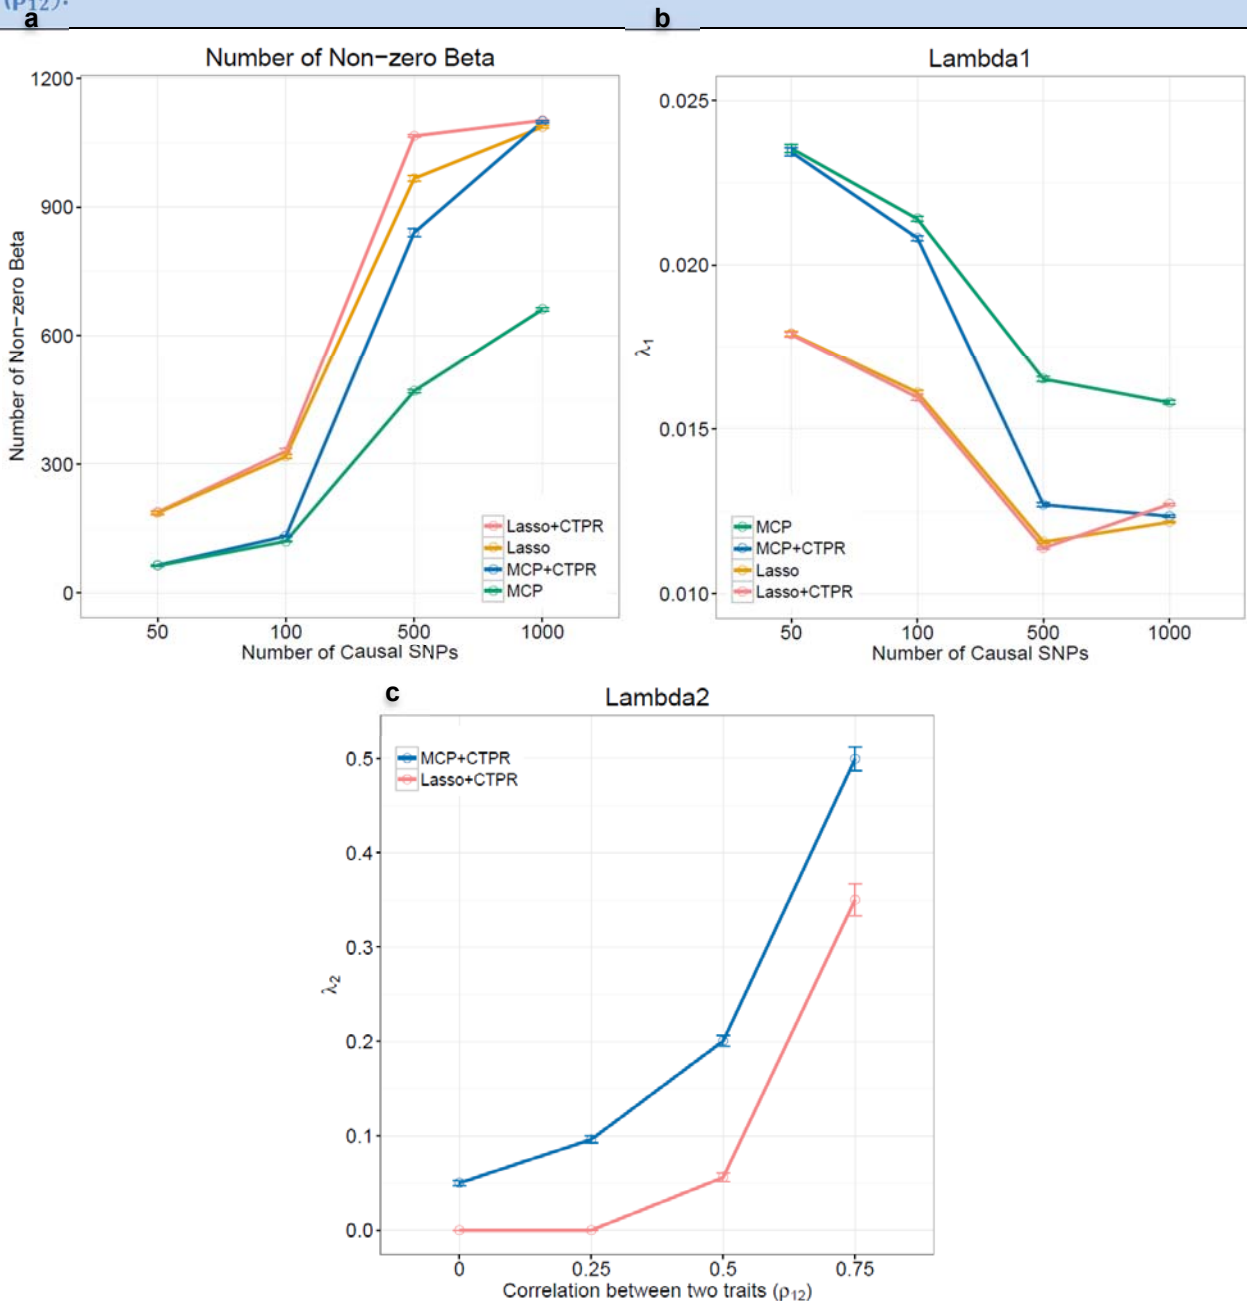

We implemented coordinate descent algorithm for obtaining the estimates for SNP effects ( $\hat{\beta}$ ) in the proposed prediction model. Below we evaluated how well the model fits the data with one of our simulation scenarios where the number of training samples, number of SNPs and genetic correlation are 14,800, 5,000 and 0.75. All error bars represent standard errors of prediction  $R^2$ .

**(a) (b)** We varied the number of causal SNPs from 50 to 1,000 and summarized the number of estimated non-zero SNP effects and the tuning parameter for sparsity penalty ( $\lambda_1$ ) by averaging

over 100 replications. As the number of causal SNPs increased, the number of estimated non-zero SNP effects increased but the sparsity tuning parameter ( $\lambda_1$ ) decreased. For example, with 50 causal SNPs, we had 63.27 (or 185.96) non-zero SNP effects and  $\lambda_1=0.0235$  (or 0.0179) using MCP (or Lasso) but, with 1,000 causal SNPs, we had 660.97 (or 1086.56) non-zero SNP effects and  $\lambda_1=0.0157$  (or 0.0121). Multi-trait methods tended to have more non-zero SNP effects than single-trait methods because of the induced smoothness of the coefficients from cross-trait penalty function. Since small (or large)  $\lambda_1$  may be selected with large (or small) number of non-zero SNP effects, the  $\lambda_1$  estimates showed the opposite pattern to the number of non-zero SNP effects.

**(c)** We varied the genetic correlation from 0 to 0.75 with 500 causal SNPs and reported the average tuning parameters for cross-trait penalty ( $\lambda_2$ ) over 100 replications. As expected, larger genetic correlation led to larger  $\lambda_2$  for cross-trait penalty. We then computed the slopes of the regression of phenotypic values on the predicted ones within the same simulation setting. Most slopes were close to 1 for both single-trait and multi-trait methods (range=0.97-1.31) in Supplementary Table 2.

Supplementary Figure 7. Scatter plots for phenotypic correlation between height (HGT) vs. body mass index (BMI) based on original and age, sex-adjusted phenotypic values in UK Biobank data and NHS/HPFS/PHS Cohort.

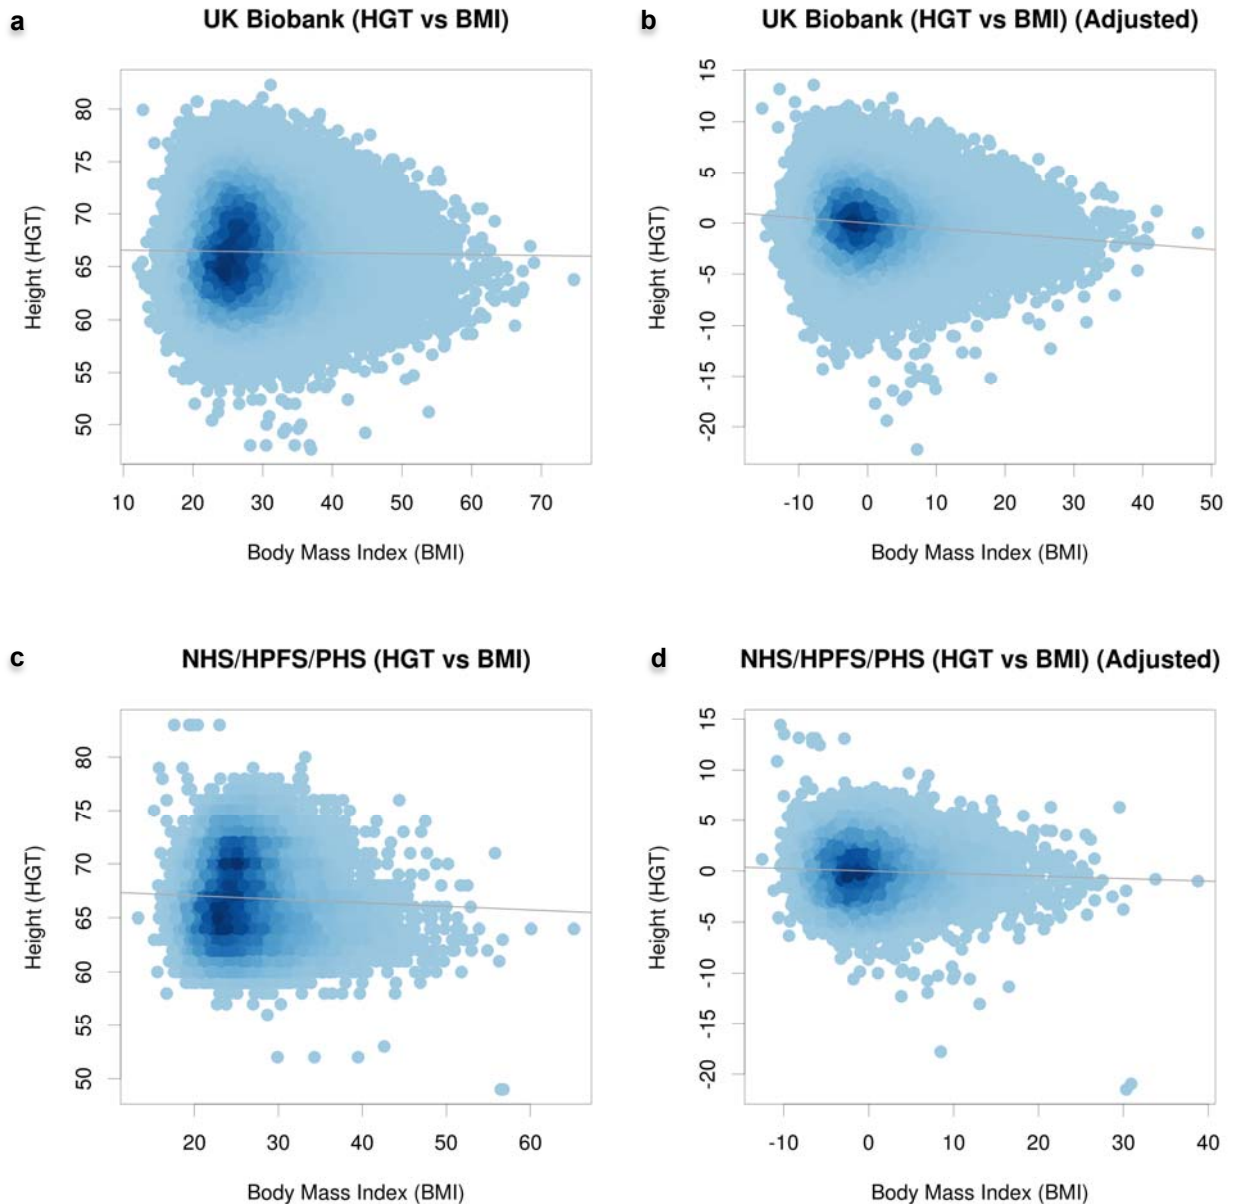

**(a) (b)** The phenotypic correlations between HGT and BMI were computed in UK Biobank with and without adjusting for age and sex. After adjusting for age and sex, HGT and BMI were negatively correlated.

**(c) (d)** The phenotypic correlations between HGT and BMI were computed in NHS/HPFS/PHS cohort with and without adjusting for age and sex. After adjusting for age and sex, HGT and BMI were negatively correlated.

Supplementary Figure 8. Scatter plots for phenotypic correlation between height (HGT) vs. other phenotypes (HIP, WST and WHR) based on original and age, sex-adjusted phenotypic values in UK Biobank data.

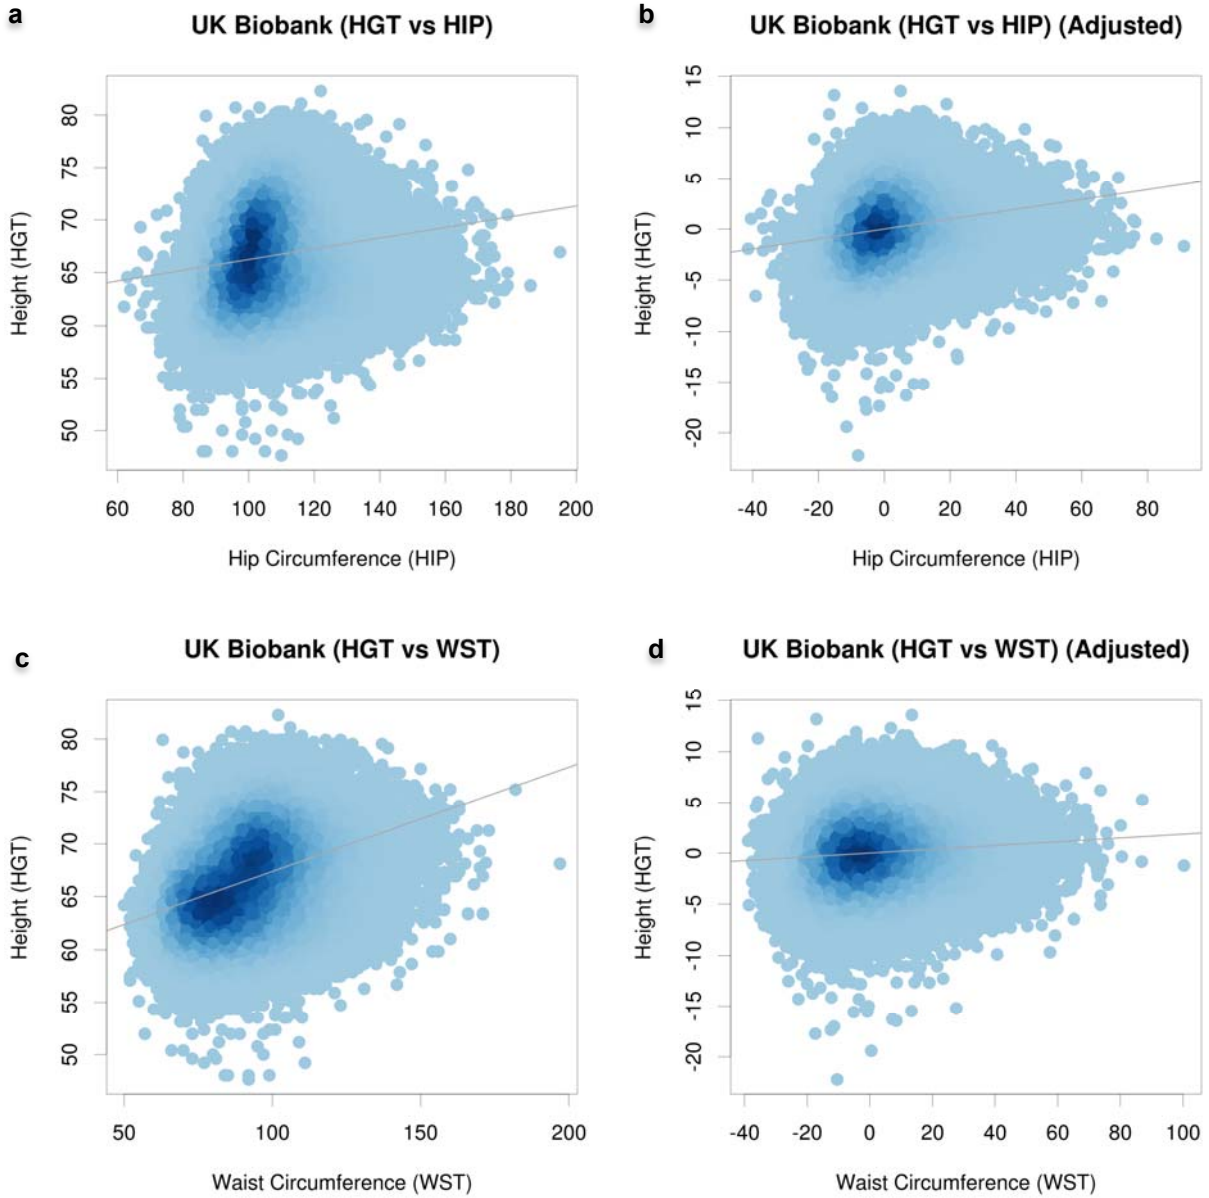

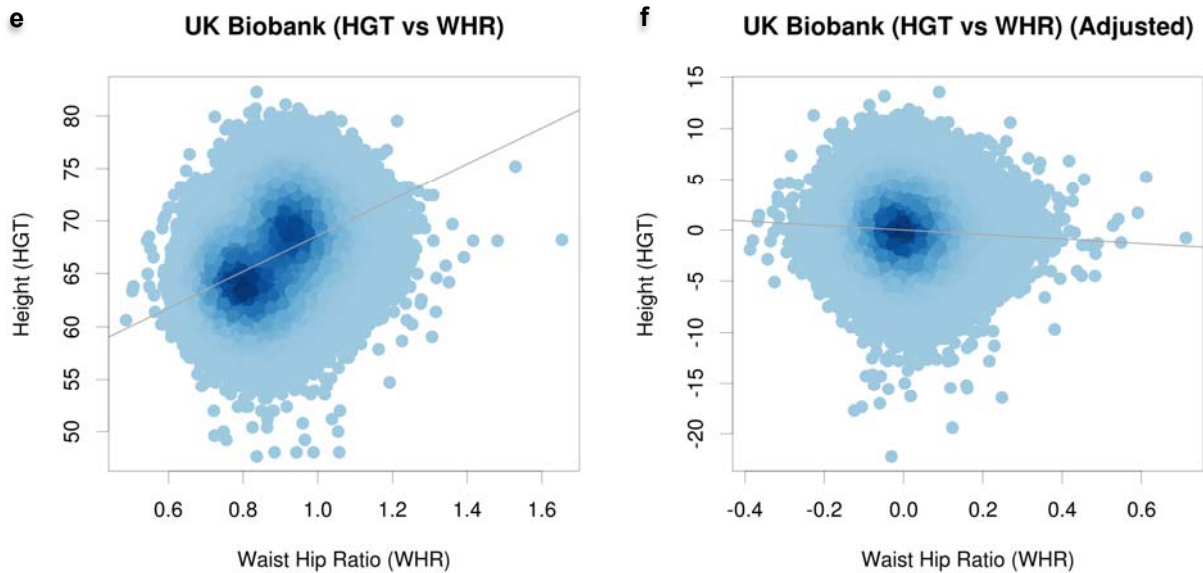

**(a) (b)** The phenotypic correlations between HGT and HIP were computed in UK Biobank with and without adjusting for age and sex. After adjusting for age and sex, HGT and BMI were positively correlated.

**(c) (d)** The phenotypic correlations between HGT and WST were computed in UK Biobank with and without adjusting for age and sex. After adjusting for age and sex, HGT and WST were positively correlated.

**(e) (f)** The phenotypic correlations between HGT and WHR were computed in UK Biobank with and without adjusting for age and sex. After adjusting for age and sex, HGT and WHR were negatively correlated.

Supplementary Figure 9. Effect of sample size and trait-heritability on prediction accuracy using Lasso or Ridge based methods with 5,000 SNPs. (a) We considered three different training sample sizes ( $N = 3,700 / 7,400 / 14,800$ ) with 50% trait-heritability. (b) We examined three different trait-heritability levels ( $h^2 = 20\% / 40\% / 60\%$ ) with 7,400 samples.

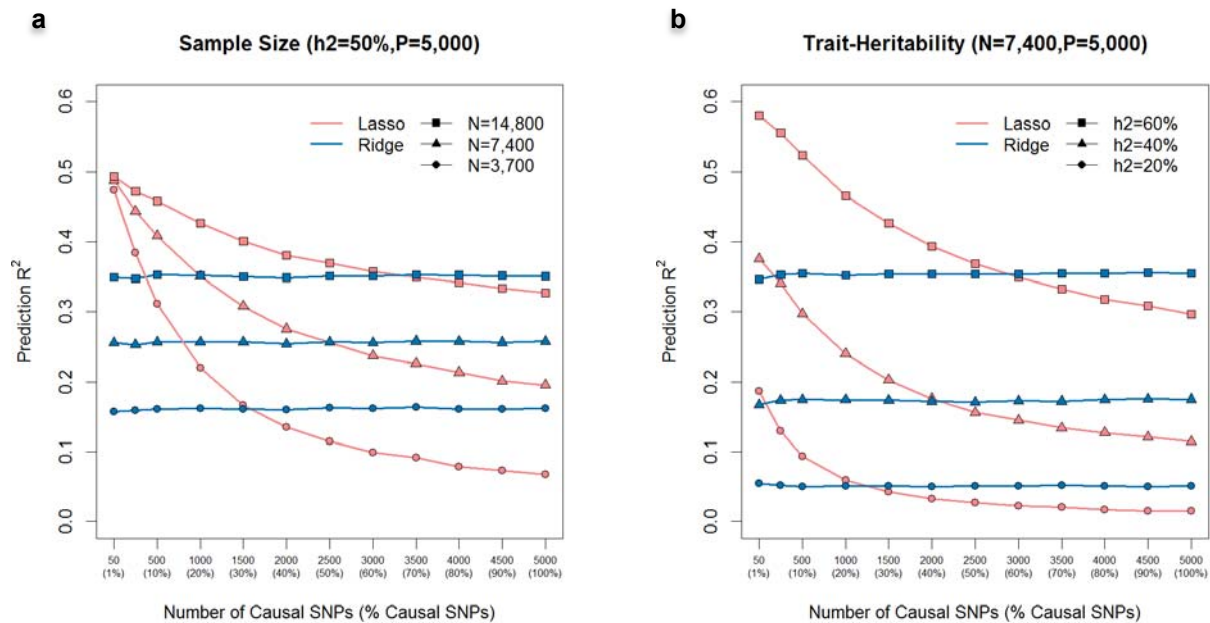

To demonstrate how the power to detect causal SNPs would affect the relative performance between our penalized regression based methods (Lasso) and GBLUP (or Ridge) based methods, we conducted simulations with 5,000 SNPs using ‘glmnet’ package (version 2.0.1) in R. We considered three different sample sizes (i.e. 3,700, 7,400, 14,800) with 50% trait-heritability and next examined three different trait-heritability levels (i.e. 20%, 40% or 60%) with 7,400 samples while we varied the proportion of causal SNPs from 1% to 100%. The prediction  $R^2$  were averaged over 100 replications. We confirmed that Lasso results using our software were the same as Lasso using ‘glmnet’ and GBLUP results were the same as Ridge using ‘glmnet’. For given sample size and given total trait-heritability, the Ridge/GBLUP based method is always the best for the 100% infinitesimal scenario. However, when the true genetic architecture is deviated from 100% infinitesimal model, the Lasso based method becomes better. Importantly, the crossing point of the Lasso (red) and the Ridge/GBLUP (blue) lines moves toward 100% causal SNPs as the power to detect causal SNP increases (i.e. by increasing sample size or increasing trait-heritability). For example, for a training sample size of 14,800, the Lasso based method becomes better than GBLUP based method even if more than 65% of all SNPs are causal.

**(a)** We considered three different training sample sizes ( $N = 3,700 / 7,400 / 14,800$ ) with 50% trait-heritability to compare Lasso vs. Ridge based methods.

**(b)** We examined three different trait-heritability levels ( $h^2 = 20\% / 40\% / 60\%$ ) with 7,400 samples to compare Lasso vs. Ridge based methods.



Supplementary Figure 10. Effect of number of SNPs on prediction accuracy using Lasso vs Ridge based methods with 40% trait-heritability. (a) We considered four different number of SNPs ( $P = 5,000 / 10,000 / 20,000 / 40,000$ ) with 11,473 samples. (b) We considered four different number of SNPs ( $P = 5,000 / 10,000 / 20,000 / 40,000$ ) with 22,946 samples.

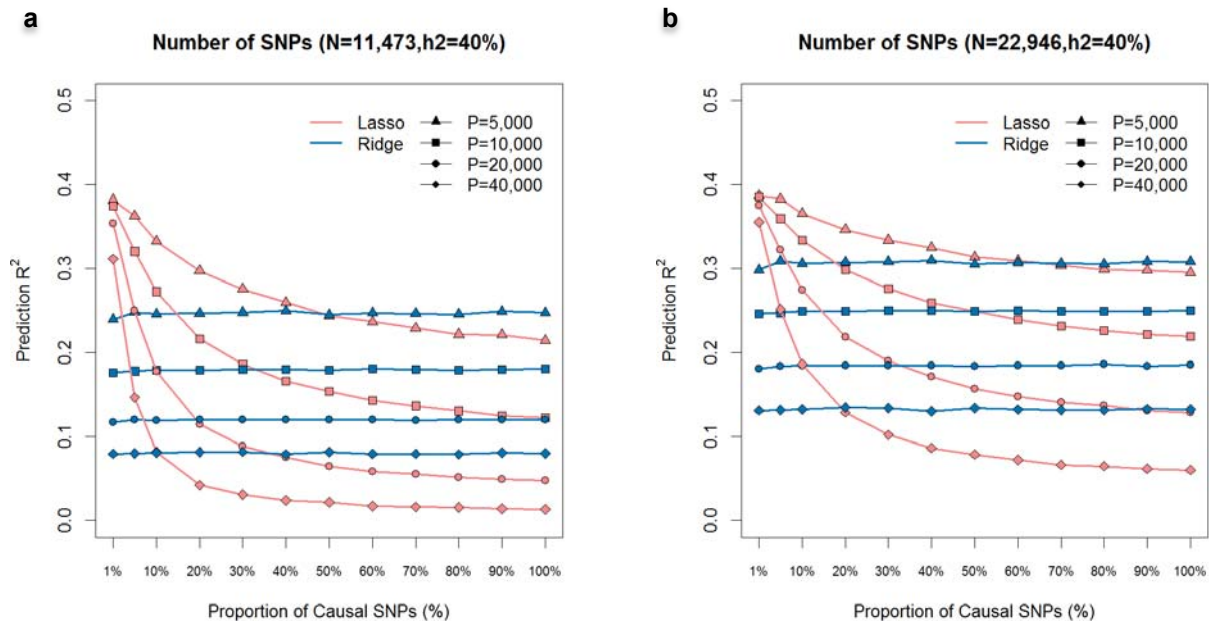

We examined the effect of large number of SNPs (i.e. low prediction power) on performance comparison between Lasso and Ridge/GBLUP based methods. We considered four different numbers of SNPs (i.e. 5,000, 10,000, 20,000 and 40,000) with 40% trait-heritability and 11,473 samples while we varied the proportion of causal SNPs from 1% to 100%. As expected, the crossing point of Lasso and Ridge/GBLUP moves toward less causal SNP models as more SNPs are included. For example, the crossing point was 50% with 5,000 SNPs while it became 11% with 40,000 SNPs. However, it moves toward more causal SNP models with larger sample sizes.

**(a)** We considered four different number of SNPs ( $P = 5,000 / 10,000 / 20,000 / 40,000$ ) with 11,473 samples to compare predictive performance between Lasso and Ridge based methods.

**(b)** We considered four different number of SNPs ( $P = 5,000 / 10,000 / 20,000 / 40,000$ ) with 22,946 samples to compare predictive performance between Lasso and Ridge based methods.

Supplementary Figure 11. Simulation results using PRS, LDpred, MTAG, MTGBLUP and CTPR methods when genetic correlation between two traits,  $\rho = 0.15$ . (a) Effect of number of traits (T) on prediction accuracy with  $N=30K$  and  $\rho=0.15$ . (b) Effect of sample size on prediction accuracy with  $T=2$  and  $\rho=0.15$ .

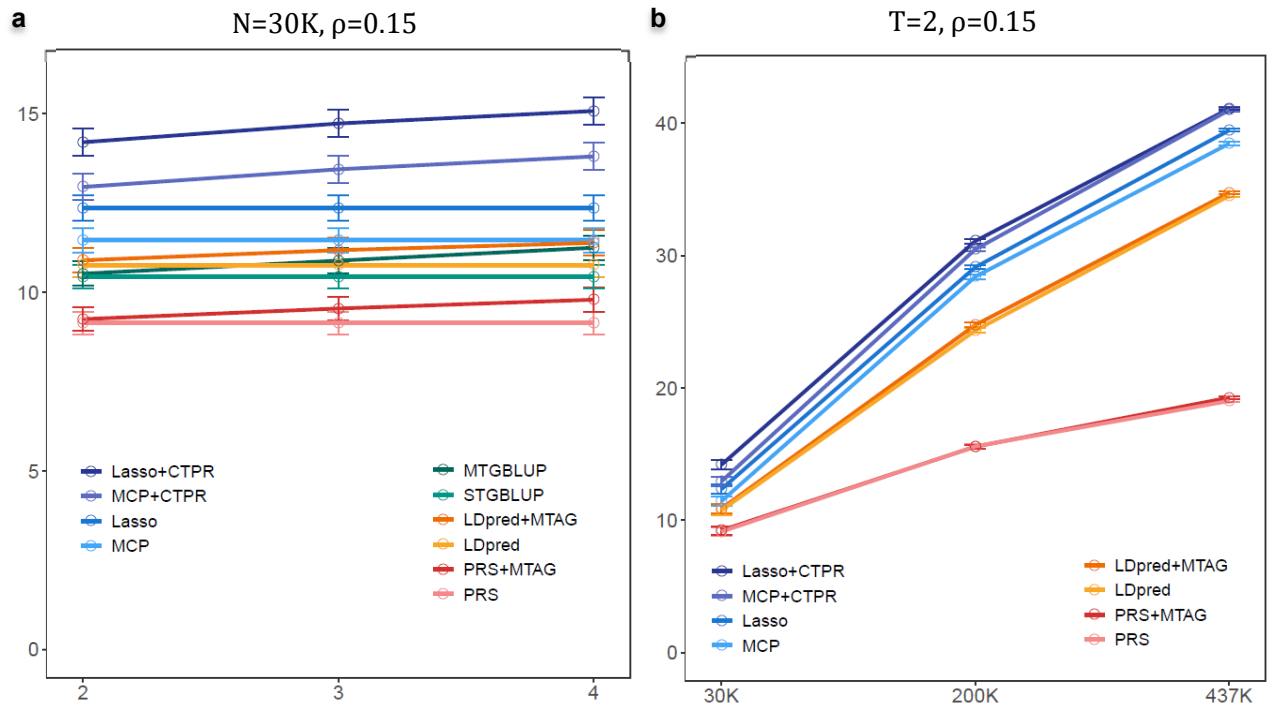

To more closely match the genetic correlation obtained in the real data, we conducted additional simulations with the genetic correlation among traits=0.15. We first considered the scenario with 30K training samples, two traits and genetic correlation=0.15. Because genetic correlation between two traits is smaller than the previous simulation settings in Figure 2a, a gain in PA of multi-trait methods over single-trait methods is smaller. And then we included more traits from 2 to 4 while the genetic correlation between the primary trait and each of the secondary traits=0.15 and the genetic correlation among secondary traits=0. The PA of multi-trait methods increased as more traits were included but a gain in PA over single-trait methods decreased when compared to results in Figure 2b. We next increased the sample size from 30K to 437K and found that the PA of both single-trait and multi-trait methods adequately increased but the gap between them is smaller than the results in Figure 2c. All error bars represent standard errors of prediction  $R^2$ .

Supplementary Table 1. Prediction  $R^2$  and mean squared error (MSE) with different sample sizes (N=30K,200K,437K) and number of traits (T=2,3,4) and genetic correlations ( $\rho=0.25,0.5,0.75$ ) using LDpred, MTAG, STGBLUP, MTGBLUP and CTPR methods.

| N   | #Traits | $\rho$ | Method      | $R^2$  | MSE     | Slope   |
|-----|---------|--------|-------------|--------|---------|---------|
| 30K | 2       | 0.25   | PRS         | 0.0914 | 8154.01 | -0.0094 |
|     |         |        | LDpred      | 0.1076 | 1.4363  | 0.9077  |
|     |         |        | STGBLUP     | 0.1043 | 0.8869  | 0.9854  |
|     |         |        | MCP         | 0.1145 | 0.8867  | 0.9812  |
|     |         |        | LAS         | 0.1235 | 0.8878  | 1.4261  |
|     |         |        | PRS+MTAG    | 0.0926 | 6602.41 | -0.0095 |
|     |         |        | LDpred+MTAG | 0.1094 | 1.2972  | 0.8637  |
|     |         |        | MTGBLUP     | 0.1057 | 0.8855  | 0.9910  |
|     |         |        | MCP+CTPR    | 0.1345 | 0.8739  | 1.43313 |
|     |         |        | LAS+CTPR    | 0.1425 | 0.8549  | 1.29360 |
| 30K | 2       | 0.5    | PRS         | 0.0914 | 8154.01 | -0.0094 |
|     |         |        | LDpred      | 0.1076 | 1.4363  | 0.9077  |
|     |         |        | STGBLUP     | 0.1043 | 0.8869  | 0.9854  |
|     |         |        | MCP         | 0.1145 | 0.8867  | 0.9812  |
|     |         |        | LAS         | 0.1235 | 0.8878  | 1.4261  |
|     |         |        | PRS+MTAG    | 0.0943 | 7349.59 | -0.0097 |
|     |         |        | LDpred+MTAG | 0.1123 | 1.4291  | 0.8469  |
|     |         |        | MTGBLUP     | 0.1086 | 0.8826  | 0.9953  |
|     |         |        | MCP+CTPR    | 0.1393 | 0.8672  | 1.3437  |
|     |         |        | LAS+CTPR    | 0.1470 | 0.8500  | 1.27678 |
| 30K | 2       | 0.75   | PRS         | 0.0914 | 8154.01 | -0.0094 |
|     |         |        | LDpred      | 0.1076 | 1.4363  | 0.9077  |
|     |         |        | STGBLUP     | 0.1043 | 0.8869  | 0.9854  |
|     |         |        | MCP         | 0.1145 | 0.8867  | 0.9812  |
|     |         |        | LAS         | 0.1235 | 0.8878  | 1.4261  |
|     |         |        | PRS+MTAG    | 0.0975 | 5983.37 | -0.0100 |
|     |         |        | LDpred+MTAG | 0.1170 | 1.1912  | 0.8261  |
|     |         |        | MTGBLUP     | 0.1130 | 0.8782  | 1.0034  |
|     |         |        | MCP+CTPR    | 0.1441 | 0.8599  | 1.2654  |
|     |         |        | LAS+CTPR    | 0.1529 | 0.8440  | 1.2651  |
| 30K | 3       | 0.5    | PRS         | 0.0914 | 8154.01 | -0.0094 |
|     |         |        | LDpred      | 0.1076 | 1.4363  | 0.9077  |
|     |         |        | STGBLUP     | 0.1043 | 0.8869  | 0.9854  |
|     |         |        | MCP         | 0.1145 | 0.8867  | 0.9812  |
|     |         |        | LAS         | 0.1235 | 0.8878  | 1.4261  |
|     |         |        | PRS+MTAG    | 0.0988 | 5564.60 | -0.0114 |
|     |         |        | LDpred+MTAG | 0.1183 | 1.1467  | 0.8350  |

|      |   |     |             |        |          |         |
|------|---|-----|-------------|--------|----------|---------|
|      |   |     | MTGBLUP     | 0.1158 | 0.8643   | 1.0024  |
|      |   |     | MCP+CTPR    | 0.1447 | 0.8802   | 1.8260  |
|      |   |     | LAS+CTPR    | 0.1515 | 0.8564   | 1.5214  |
| 30K  | 4 | 0.5 | PRS         | 0.0914 | 8154.01  | -0.0094 |
|      |   |     | LDpred      | 0.1076 | 1.4363   | 0.9077  |
|      |   |     | STGBLUP     | 0.1043 | 0.8869   | 0.9854  |
|      |   |     | MCP         | 0.1145 | 0.8867   | 0.9812  |
|      |   |     | LAS         | 0.1235 | 0.8878   | 1.4261  |
|      |   |     | PRS+MTAG    | 0.0998 | 5395.40  | -0.0125 |
|      |   |     | LDpred+MTAG | 0.1194 | 1.1325   | 0.8435  |
|      |   |     | MTGBLUP     | 0.1164 | 0.8536   | 1.0064  |
|      |   |     | MCP+CTPR    | 0.1475 | 0.8346   | 1.2896  |
|      |   |     | LAS+CTPR    | 0.1540 | 0.8246   | 1.2984  |
| 200K | 2 | 0.5 | PRS         | 0.1559 | 4129.56  | -0.0163 |
|      |   |     | LDpred      | 0.2435 | 2.5768   | 0.6544  |
|      |   |     | MCP         | 0.2842 | 0.7645   | 0.4763  |
|      |   |     | LAS         | 0.2913 | 0.7404   | 0.6059  |
|      |   |     | PRS+MTAG    | 0.1554 | 2922.19  | -0.0163 |
|      |   |     | LDpred+MTAG | 0.2499 | 2.9502   | 0.6424  |
|      |   |     | MCP+CTPR    | 0.3094 | 0.7494   | 0.5328  |
|      |   |     | LAS+CTPR    | 0.3118 | 0.7295   | 0.6295  |
| 437K | 2 | 0.5 | PRS         | 0.1902 | 3270.83  | -0.0179 |
|      |   |     | LDpred      | 0.3453 | 141.7601 | 0.1797  |
|      |   |     | MCP         | 0.3848 | 0.7292   | 0.5584  |
|      |   |     | LAS         | 0.3948 | 0.6948   | 0.6984  |
|      |   |     | PRS+MTAG    | 0.1933 | 2609.21  | -0.0179 |
|      |   |     | LDpred+MTAG | 0.3483 | 54.9642  | 0.1760  |
|      |   |     | MCP+CTPR    | 0.4128 | 0.6948   | 0.6948  |
|      |   |     | LAS+CTPR    | 0.4148 | 0.6489   | 0.7948  |

Abbreviations: #Traits=number of traits,  $\rho$ =genetic correlation between two traits,  $R^2$ =prediction accuracy, Slope=slope of the regression of phenotypic values on the predicted ones

Supplementary Table 2. Prediction  $R^2$  and mean squared error (MSE) with number of causal SNPs=500 or 1000 and 2 traits, 14,800 training samples, 5,000 SNPs,  $h^2 = (0.5, 0.5)$  and 100 replicates.

| # Causal | Method     | $\rho_{12}$ | $R^2$  | $SE(R^2)$ | MSE    | $SE(MSE)$ | Slope  | # Nz $\beta$ | $\lambda_1$ | $\lambda_2$ |
|----------|------------|-------------|--------|-----------|--------|-----------|--------|--------------|-------------|-------------|
| 500      | Lasso      | 0           | 0.4109 | 0.0021    | 0.6019 | 0.0013    | 1.1826 | 985.11       | 0.0114      | .           |
|          |            | 0.25        | 0.4093 | 0.0020    | 0.6021 | 0.0013    | 1.1802 | 987.36       | 0.0114      | .           |
|          |            | 0.5         | 0.4069 | 0.0025    | 0.6008 | 0.0013    | 1.1829 | 980.25       | 0.0115      | .           |
|          |            | 0.75        | 0.4074 | 0.0022    | 0.6035 | 0.0012    | 1.1861 | 966.5        | 0.0116      | .           |
|          |            | 1           | 0.4102 | 0.0020    | 0.6039 | 0.0014    | 1.1895 | 974.97       | 0.0115      | .           |
|          | Lasso+CTPR | 0           | 0.4109 | 0.0021    | 0.6019 | 0.0013    | 1.1826 | 985.11       | 0.0114      | 0.0000      |
|          |            | 0.25        | 0.4093 | 0.0020    | 0.6021 | 0.0013    | 1.1802 | 987.36       | 0.0114      | 0.0000      |
|          |            | 0.5         | 0.4091 | 0.0024    | 0.6014 | 0.0013    | 1.2128 | 1021.7       | 0.0113      | 0.0560      |
|          |            | 0.75        | 0.4193 | 0.0021    | 0.6011 | 0.0012    | 1.2751 | 1065.56      | 0.0114      | 0.3502      |
|          |            | 1           | 0.4514 | 0.0019    | 0.5779 | 0.0012    | 1.3139 | 1023.7       | 0.0124      | 8.9349      |
|          | MCP        | 0           | 0.4147 | 0.0022    | 0.5884 | 0.0013    | 0.9788 | 474.57       | 0.0164      | .           |
|          |            | 0.25        | 0.4130 | 0.0021    | 0.5890 | 0.0011    | 0.9733 | 480.98       | 0.0164      | .           |
|          |            | 0.5         | 0.4104 | 0.0025    | 0.5878 | 0.0012    | 0.9777 | 473.46       | 0.0164      | .           |
|          |            | 0.75        | 0.4106 | 0.0022    | 0.5904 | 0.0012    | 0.9784 | 469.64       | 0.0165      | .           |
|          |            | 1           | 0.4145 | 0.0021    | 0.5892 | 0.0013    | 0.9812 | 476.5        | 0.0164      | .           |
|          | MCP+CTPR   | 0           | 0.4157 | 0.0022    | 0.5875 | 0.0013    | 1.0192 | 534.24       | 0.0156      | 0.0501      |
|          |            | 0.25        | 0.4170 | 0.0021    | 0.5852 | 0.0011    | 1.0290 | 582.69       | 0.0150      | 0.0962      |
|          |            | 0.5         | 0.4186 | 0.0025    | 0.5798 | 0.0012    | 1.0362 | 663.43       | 0.0142      | 0.2006      |
|          |            | 0.75        | 0.4275 | 0.0021    | 0.5733 | 0.0010    | 1.0107 | 840.07       | 0.0127      | 0.4993      |
|          |            | 1           | 0.4624 | 0.0019    | 0.5408 | 0.0010    | 0.9957 | 1020.49      | 0.0119      | 11.1990     |
| 1000     | Lasso      | 0           | 0.3444 | 0.0021    | 0.6705 | 0.0013    | 1.2353 | 1085.25      | 0.0122      | .           |
|          |            | 0.25        | 0.3482 | 0.0018    | 0.6691 | 0.0015    | 1.2323 | 1093.13      | 0.0121      | .           |
|          |            | 0.5         | 0.3442 | 0.0017    | 0.6687 | 0.0014    | 1.2317 | 1087.72      | 0.0121      | .           |
|          |            | 0.75        | 0.3438 | 0.0018    | 0.6698 | 0.0014    | 1.2361 | 1086.56      | 0.0122      | .           |
|          |            | 1           | 0.3425 | 0.0016    | 0.6687 | 0.0014    | 1.2276 | 1087.82      | 0.0122      | .           |
|          | Lasso+CTPR | 0           | 0.3444 | 0.0021    | 0.6705 | 0.0013    | 1.2353 | 1085.25      | 0.0122      | 0.0000      |
|          |            | 0.25        | 0.3483 | 0.0018    | 0.6692 | 0.0015    | 1.2352 | 1094.49      | 0.0121      | 0.0031      |
|          |            | 0.5         | 0.3477 | 0.0017    | 0.6701 | 0.0015    | 1.2841 | 1107.35      | 0.0122      | 0.0650      |
|          |            | 0.75        | 0.3602 | 0.0017    | 0.6699 | 0.0015    | 1.3959 | 1101.67      | 0.0127      | 0.3116      |
|          |            | 1           | 0.3881 | 0.0015    | 0.6508 | 0.0013    | 1.4693 | 1073.77      | 0.0138      | 4.1057      |
|          | MCP        | 0           | 0.3327 | 0.0022    | 0.6708 | 0.0014    | 0.9477 | 656.69       | 0.0158      | .           |
|          |            | 0.25        | 0.3360 | 0.0020    | 0.6702 | 0.0016    | 0.9474 | 657.78       | 0.0158      | .           |
|          |            | 0.5         | 0.3321 | 0.0019    | 0.6697 | 0.0014    | 0.9485 | 652.99       | 0.0159      | .           |
|          |            | 0.75        | 0.3315 | 0.0020    | 0.6707 | 0.0015    | 0.9483 | 660.97       | 0.0158      | .           |
|          |            | 1           | 0.3310 | 0.0017    | 0.6700 | 0.0015    | 0.9402 | 663.06       | 0.0157      | .           |
|          | MCP+CTPR   | 0           | 0.3431 | 0.0020    | 0.6598 | 0.0013    | 1.0332 | 930.05       | 0.0130      | 0.1544      |
|          |            | 0.25        | 0.3543 | 0.0019    | 0.6509 | 0.0015    | 1.0334 | 1038.15      | 0.0123      | 0.2392      |
|          |            | 0.5         | 0.3607 | 0.0017    | 0.6403 | 0.0013    | 1.0250 | 1089.53      | 0.0121      | 0.3557      |
|          |            | 0.75        | 0.3758 | 0.0018    | 0.6254 | 0.0014    | 1.0185 | 1098.9       | 0.0123      | 0.6157      |
|          |            | 1           | 0.4047 | 0.0015    | 0.5948 | 0.0012    | 1.0167 | 1080.52      | 0.0130      | 4.3590      |

Abbreviations: # Causal=number of causal SNPs,  $\rho_{12}$ =genetic correlation between two traits, #Nz  $\beta$ =number of estimated nonzero SNP effects

Supplementary Table 3. Prediction  $R^2$  and mean squared error (MSE) with  $\rho_{12} = 0.1, 0.5, 0.7$  or  $0.9$  and 2 traits, 14,800 training samples, 5,000 SNPs,  $h^2 = (0.5, 0.5)$  and 100 replicates.

| $\rho_{12}$ | Method     | %S   | $R^2$  | SE( $R^2$ ) | MSE    | SE(MSE) | Slope  | # Nz $\beta$ | $\lambda_1$ | $\lambda_2$ |
|-------------|------------|------|--------|-------------|--------|---------|--------|--------------|-------------|-------------|
| 0.1         | Lasso      | 0    | 0.4066 | 0.0021      | 0.6030 | 0.0014  | 1.1867 | 984.0        | 0.0115      | .           |
|             |            | 0.25 | 0.4078 | 0.0022      | 0.6024 | 0.0014  | 1.1866 | 973.2        | 0.0115      | .           |
|             |            | 0.5  | 0.4050 | 0.0019      | 0.6015 | 0.0012  | 1.1836 | 973.6        | 0.0115      | .           |
|             |            | 0.75 | 0.4098 | 0.0023      | 0.6019 | 0.0012  | 1.1751 | 987.4        | 0.0114      | .           |
|             |            | 1    | 0.4106 | 0.0021      | 0.6028 | 0.0012  | 1.1845 | 986.7        | 0.0114      | .           |
|             | Lasso+CTPR | 0    | 0.4066 | 0.0021      | 0.6030 | 0.0014  | 1.1867 | 984.0        | 0.0115      | 0.0000      |
|             |            | 0.25 | 0.4078 | 0.0022      | 0.6024 | 0.0014  | 1.1866 | 973.2        | 0.0115      | 0.0000      |
|             |            | 0.5  | 0.4050 | 0.0019      | 0.6015 | 0.0012  | 1.1836 | 973.6        | 0.0115      | 0.0000      |
|             |            | 0.75 | 0.4098 | 0.0023      | 0.6019 | 0.0012  | 1.1751 | 987.4        | 0.0114      | 0.0000      |
|             |            | 1    | 0.4106 | 0.0021      | 0.6028 | 0.0012  | 1.1845 | 986.7        | 0.0114      | 0.0000      |
|             | MCP        | 0    | 0.4100 | 0.0021      | 0.5897 | 0.0013  | 0.9787 | 475.1        | 0.0164      | .           |
|             |            | 0.25 | 0.4109 | 0.0023      | 0.5894 | 0.0014  | 0.9773 | 471.4        | 0.0165      | .           |
|             |            | 0.5  | 0.4082 | 0.0019      | 0.5890 | 0.0012  | 0.9765 | 468.9        | 0.0165      | .           |
|             |            | 0.75 | 0.4140 | 0.0023      | 0.5890 | 0.0012  | 0.9718 | 475.8        | 0.0164      | .           |
|             |            | 1    | 0.4136 | 0.0022      | 0.5900 | 0.0013  | 0.9801 | 469.6        | 0.0165      | .           |
|             | MCP+CTPR   | 0    | 0.4117 | 0.0021      | 0.5883 | 0.0013  | 1.0364 | 544.0        | 0.0154      | 0.0605      |
|             |            | 0.25 | 0.4128 | 0.0023      | 0.5877 | 0.0014  | 1.0311 | 541.3        | 0.0155      | 0.0599      |
|             |            | 0.5  | 0.4103 | 0.0019      | 0.5868 | 0.0012  | 1.0278 | 539.9        | 0.0155      | 0.0605      |
|             |            | 0.75 | 0.4158 | 0.0024      | 0.5869 | 0.0012  | 1.0213 | 548.2        | 0.0154      | 0.0627      |
|             |            | 1    | 0.4160 | 0.0022      | 0.5876 | 0.0013  | 1.0262 | 542.2        | 0.0154      | 0.0620      |
| 0.5         | Lasso      | 0    | 0.4073 | 0.0022      | 0.6030 | 0.0013  | 1.1878 | 977.5        | 0.0115      | .           |
|             |            | 0.25 | 0.4086 | 0.0023      | 0.6013 | 0.0014  | 1.1818 | 985.6        | 0.0114      | .           |
|             |            | 0.5  | 0.4070 | 0.0024      | 0.6031 | 0.0011  | 1.1877 | 974.0        | 0.0115      | .           |
|             |            | 0.75 | 0.4073 | 0.0021      | 0.6048 | 0.0014  | 1.1863 | 978.0        | 0.0115      | .           |
|             |            | 1    | 0.4067 | 0.0019      | 0.6023 | 0.0011  | 1.1868 | 972.9        | 0.0116      | .           |
|             | Lasso+CTPR | 0    | 0.4073 | 0.0022      | 0.6030 | 0.0013  | 1.1878 | 977.5        | 0.0115      | 0.0000      |
|             |            | 0.25 | 0.4086 | 0.0023      | 0.6013 | 0.0014  | 1.1818 | 985.6        | 0.0114      | 0.0000      |
|             |            | 0.5  | 0.4070 | 0.0024      | 0.6031 | 0.0011  | 1.1877 | 974.0        | 0.0115      | 0.0000      |
|             |            | 0.75 | 0.4074 | 0.0021      | 0.6050 | 0.0014  | 1.1897 | 982.7        | 0.0115      | 0.0055      |
|             |            | 1    | 0.4085 | 0.0019      | 0.6027 | 0.0011  | 1.2098 | 1019.9       | 0.0113      | 0.0488      |
|             | MCP        | 0    | 0.4108 | 0.0022      | 0.5895 | 0.0012  | 0.9798 | 475.7        | 0.0164      | .           |
|             |            | 0.25 | 0.4128 | 0.0024      | 0.5876 | 0.0013  | 0.9778 | 477.4        | 0.0164      | .           |
|             |            | 0.5  | 0.4107 | 0.0024      | 0.5894 | 0.0011  | 0.9801 | 473.2        | 0.0164      | .           |
|             |            | 0.75 | 0.4110 | 0.0022      | 0.5913 | 0.0014  | 0.9782 | 476.8        | 0.0164      | .           |
|             |            | 1    | 0.4103 | 0.0020      | 0.5889 | 0.0011  | 0.9776 | 472.4        | 0.0165      | .           |
|             | MCP+CTPR   | 0    | 0.4127 | 0.0022      | 0.5879 | 0.0012  | 1.0355 | 549.3        | 0.0154      | 0.0606      |
|             |            | 0.25 | 0.4153 | 0.0023      | 0.5852 | 0.0013  | 1.0285 | 557.1        | 0.0153      | 0.0658      |
|             |            | 0.5  | 0.4145 | 0.0024      | 0.5862 | 0.0011  | 1.0419 | 578.1        | 0.0150      | 0.0978      |
|             |            | 0.75 | 0.4168 | 0.0022      | 0.5859 | 0.0014  | 1.0423 | 612.1        | 0.0147      | 0.1330      |

|     |            |      |        |        |        |        |        |        |        |        |
|-----|------------|------|--------|--------|--------|--------|--------|--------|--------|--------|
|     |            | 1    | 0.4187 | 0.0020 | 0.5808 | 0.0011 | 1.0377 | 647.8  | 0.0143 | 0.1878 |
| 0.7 | Lasso      | 0    | 0.4058 | 0.0019 | 0.6063 | 0.0013 | 1.1836 | 982.1  | 0.0115 | .      |
|     |            | 0.25 | 0.4051 | 0.0021 | 0.6028 | 0.0012 | 1.1902 | 967.8  | 0.0116 | .      |
|     |            | 0.5  | 0.4061 | 0.0019 | 0.6038 | 0.0012 | 1.1847 | 974.7  | 0.0115 | .      |
|     |            | 0.75 | 0.4115 | 0.0022 | 0.6018 | 0.0011 | 1.1883 | 982.1  | 0.0115 | .      |
|     |            | 1    | 0.4097 | 0.0024 | 0.6010 | 0.0013 | 1.1888 | 983.5  | 0.0114 | .      |
|     | Lasso+CTPR | 0    | 0.4058 | 0.0019 | 0.6063 | 0.0013 | 1.1836 | 982.1  | 0.0115 | 0.0000 |
|     |            | 0.25 | 0.4051 | 0.0021 | 0.6028 | 0.0012 | 1.1902 | 967.8  | 0.0116 | 0.0000 |
|     |            | 0.5  | 0.4061 | 0.0019 | 0.6038 | 0.0012 | 1.1853 | 976.4  | 0.0115 | 0.0012 |
|     |            | 0.75 | 0.4137 | 0.0022 | 0.6025 | 0.0011 | 1.2173 | 1035.7 | 0.0112 | 0.0606 |
|     |            | 1    | 0.4194 | 0.0023 | 0.6001 | 0.0013 | 1.2720 | 1066.3 | 0.0113 | 0.2499 |
|     | MCP        | 0    | 0.4099 | 0.0019 | 0.5927 | 0.0012 | 0.9771 | 478.9  | 0.0164 | .      |
|     |            | 0.25 | 0.4088 | 0.0022 | 0.5890 | 0.0013 | 0.9788 | 476.3  | 0.0164 | .      |
|     |            | 0.5  | 0.4099 | 0.0020 | 0.5903 | 0.0012 | 0.9786 | 472.5  | 0.0165 | .      |
|     |            | 0.75 | 0.4155 | 0.0023 | 0.5876 | 0.0011 | 0.9812 | 475.4  | 0.0165 | .      |
|     |            | 1    | 0.4131 | 0.0024 | 0.5874 | 0.0012 | 0.9829 | 471.9  | 0.0164 | .      |
|     | MCP+CTPR   | 0    | 0.4116 | 0.0019 | 0.5911 | 0.0012 | 1.0348 | 548.3  | 0.0154 | 0.0611 |
|     |            | 0.25 | 0.4119 | 0.0022 | 0.5861 | 0.0012 | 1.0304 | 549.9  | 0.0153 | 0.0673 |
|     |            | 0.5  | 0.4155 | 0.0020 | 0.5854 | 0.0011 | 1.0477 | 615.4  | 0.0146 | 0.1314 |
|     |            | 0.75 | 0.4242 | 0.0023 | 0.5792 | 0.0010 | 1.0404 | 660.6  | 0.0142 | 0.1857 |
|     |            | 1    | 0.4283 | 0.0024 | 0.5723 | 0.0012 | 1.0244 | 784.3  | 0.0131 | 0.3905 |
| 0.9 | Lasso      | 0    | 0.4054 | 0.0020 | 0.6016 | 0.0012 | 1.1859 | 977.0  | 0.0115 | .      |
|     |            | 0.25 | 0.4071 | 0.0026 | 0.6015 | 0.0013 | 1.1849 | 973.7  | 0.0115 | .      |
|     |            | 0.5  | 0.4085 | 0.0021 | 0.6028 | 0.0012 | 1.1885 | 974.5  | 0.0115 | .      |
|     |            | 0.75 | 0.4073 | 0.0020 | 0.6039 | 0.0013 | 1.1869 | 975.0  | 0.0115 | .      |
|     |            | 1    | 0.4074 | 0.0023 | 0.6059 | 0.0013 | 1.1877 | 980.1  | 0.0115 | .      |
|     | Lasso+CTPR | 0    | 0.4054 | 0.0020 | 0.6016 | 0.0012 | 1.1859 | 977.0  | 0.0115 | 0.0000 |
|     |            | 0.25 | 0.4071 | 0.0026 | 0.6015 | 0.0013 | 1.1849 | 973.7  | 0.0115 | 0.0000 |
|     |            | 0.5  | 0.4089 | 0.0021 | 0.6032 | 0.0012 | 1.1966 | 995.5  | 0.0114 | 0.0171 |
|     |            | 0.75 | 0.4139 | 0.0020 | 0.6036 | 0.0014 | 1.2483 | 1060.2 | 0.0112 | 0.1584 |
|     |            | 1    | 0.4314 | 0.0021 | 0.5957 | 0.0013 | 1.3088 | 1046.8 | 0.0120 | 1.4468 |
|     | MCP        | 0    | 0.4083 | 0.0022 | 0.5891 | 0.0012 | 0.9778 | 476.0  | 0.0165 | .      |
|     |            | 0.25 | 0.4102 | 0.0027 | 0.5888 | 0.0013 | 0.9772 | 473.0  | 0.0165 | .      |
|     |            | 0.5  | 0.4121 | 0.0022 | 0.5891 | 0.0012 | 0.9787 | 474.0  | 0.0164 | .      |
|     |            | 0.75 | 0.4115 | 0.0021 | 0.5897 | 0.0013 | 0.9795 | 474.5  | 0.0164 | .      |
|     |            | 1    | 0.4109 | 0.0024 | 0.5923 | 0.0013 | 0.9798 | 472.4  | 0.0165 | .      |
|     | MCP+CTPR   | 0    | 0.4105 | 0.0021 | 0.5871 | 0.0012 | 1.0338 | 552.0  | 0.0153 | 0.0611 |
|     |            | 0.25 | 0.4140 | 0.0027 | 0.5854 | 0.0013 | 1.0372 | 576.1  | 0.0151 | 0.0900 |
|     |            | 0.5  | 0.4192 | 0.0022 | 0.5825 | 0.0011 | 1.0408 | 618.8  | 0.0145 | 0.1387 |
|     |            | 0.75 | 0.4239 | 0.0021 | 0.5775 | 0.0012 | 1.0312 | 725.5  | 0.0136 | 0.2788 |
|     |            | 1    | 0.4410 | 0.0022 | 0.5619 | 0.0012 | 0.9938 | 1016.4 | 0.0118 | 1.6281 |

Abbreviation: %S=proportion of shared causal SNPs between two traits

Supplementary Table 4. Prediction  $R^2$  and mean squared error (MSE) with  $h^2 = (0.5, 0.25), (0.5, 0.75), (0.25, 0.25)$  or  $(0.75, 0.75)$  and 2 traits, 14,800 training samples, 5,000 SNPs, 500 Causal SNPs and 100 replicates.

| $h^2$      | Method     | $\rho_{12}$ | $R^2$  | SE( $R^2$ ) | MSE    | SE(MSE) | Slope  | # Nz $\beta$ | $\lambda_1$ | $\lambda_2$ |
|------------|------------|-------------|--------|-------------|--------|---------|--------|--------------|-------------|-------------|
| (0.5,0.25) | Lasso      | 0           | 0.4094 | 0.0021      | 0.6031 | 0.0012  | 1.1867 | 977.61       | 0.0115      | .           |
|            |            | 0.25        | 0.4068 | 0.0021      | 0.6011 | 0.0013  | 1.1889 | 971.53       | 0.0116      | .           |
|            |            | 0.5         | 0.4046 | 0.0021      | 0.6031 | 0.0012  | 1.1819 | 980.07       | 0.0115      | .           |
|            |            | 0.75        | 0.4068 | 0.0019      | 0.6036 | 0.0013  | 1.1793 | 991.64       | 0.0114      | .           |
|            |            | 1           | 0.4080 | 0.0022      | 0.6033 | 0.0014  | 1.1801 | 981.88       | 0.0115      | .           |
|            | Lasso+CTPR | 0           | 0.4094 | 0.0021      | 0.6031 | 0.0012  | 1.1867 | 977.61       | 0.0115      | 0.0000      |
|            |            | 0.25        | 0.4068 | 0.0021      | 0.6011 | 0.0013  | 1.1889 | 971.53       | 0.0116      | 0.0000      |
|            |            | 0.5         | 0.4046 | 0.0021      | 0.6032 | 0.0012  | 1.1820 | 981.49       | 0.0115      | 0.0006      |
|            |            | 0.75        | 0.4080 | 0.0019      | 0.6043 | 0.0013  | 1.1982 | 1016.32      | 0.0113      | 0.0323      |
|            |            | 1           | 0.4190 | 0.0022      | 0.6054 | 0.0014  | 1.3000 | 1073.61      | 0.0113      | 0.3260      |
|            | MCP        | 0           | 0.4133 | 0.0022      | 0.5891 | 0.0013  | 0.9804 | 475.76       | 0.0165      | .           |
|            |            | 0.25        | 0.4104 | 0.0022      | 0.5875 | 0.0013  | 0.9794 | 466.98       | 0.0165      | .           |
|            |            | 0.5         | 0.4085 | 0.0021      | 0.5901 | 0.0012  | 0.9753 | 475.13       | 0.0164      | .           |
|            |            | 0.75        | 0.4108 | 0.0020      | 0.5905 | 0.0014  | 0.9753 | 478          | 0.0164      | .           |
|            |            | 1           | 0.4114 | 0.0023      | 0.5907 | 0.0014  | 0.9759 | 472.53       | 0.0165      | .           |
|            | MCP+CTPR   | 0           | 0.4152 | 0.0022      | 0.5875 | 0.0012  | 1.0304 | 548.53       | 0.0154      | 0.0596      |
|            |            | 0.25        | 0.4140 | 0.0021      | 0.5845 | 0.0013  | 1.0431 | 571.98       | 0.0151      | 0.0923      |
|            |            | 0.5         | 0.4153 | 0.0021      | 0.5840 | 0.0012  | 1.0533 | 658.92       | 0.0141      | 0.1628      |
|            |            | 0.75        | 0.4226 | 0.0019      | 0.5800 | 0.0013  | 1.0677 | 829.35       | 0.0127      | 0.3678      |
|            |            | 1           | 0.4367 | 0.0022      | 0.5678 | 0.0013  | 1.0851 | 1031.09      | 0.0117      | 1.4605      |
| (0.5,0.75) | Lasso      | 0           | 0.4084 | 0.0024      | 0.6029 | 0.0011  | 1.1920 | 959.22       | 0.0116      | .           |
|            |            | 0.25        | 0.4074 | 0.0021      | 0.6028 | 0.0012  | 1.1872 | 976.87       | 0.0115      | .           |
|            |            | 0.5         | 0.4084 | 0.0023      | 0.6021 | 0.0012  | 1.1846 | 976.88       | 0.0115      | .           |
|            |            | 0.75        | 0.4054 | 0.0021      | 0.6032 | 0.0014  | 1.1838 | 975.65       | 0.0115      | .           |
|            |            | 1           | 0.4096 | 0.0022      | 0.6054 | 0.0011  | 1.1888 | 985.85       | 0.0115      | .           |
|            | Lasso+CTPR | 0           | 0.4084 | 0.0024      | 0.6029 | 0.0011  | 1.1920 | 959.22       | 0.0116      | 0.0000      |
|            |            | 0.25        | 0.4075 | 0.0021      | 0.6029 | 0.0012  | 1.1885 | 977.49       | 0.0115      | 0.0018      |
|            |            | 0.5         | 0.4132 | 0.0023      | 0.6015 | 0.0012  | 1.2275 | 1051.84      | 0.0112      | 0.1217      |
|            |            | 0.75        | 0.4209 | 0.0020      | 0.5924 | 0.0013  | 1.2284 | 1054.32      | 0.0116      | 0.5741      |
|            |            | 1           | 0.4644 | 0.0020      | 0.5498 | 0.0011  | 1.1735 | 1005.82      | 0.0124      | 16.2883     |
|            | MCP        | 0           | 0.4117 | 0.0024      | 0.5891 | 0.0011  | 0.9827 | 465.99       | 0.0166      | .           |
|            |            | 0.25        | 0.4108 | 0.0021      | 0.5895 | 0.0011  | 0.9793 | 470.73       | 0.0165      | .           |
|            |            | 0.5         | 0.4117 | 0.0025      | 0.5890 | 0.0012  | 0.9792 | 469.35       | 0.0165      | .           |
|            |            | 0.75        | 0.4089 | 0.0021      | 0.5902 | 0.0013  | 0.9763 | 476.18       | 0.0164      | .           |
|            |            | 1           | 0.4138 | 0.0023      | 0.5908 | 0.0011  | 0.9813 | 480.17       | 0.0164      | .           |
|            | MCP+CTPR   | 0           | 0.4124 | 0.0024      | 0.5886 | 0.0011  | 1.0147 | 513.66       | 0.0158      | 0.0415      |
|            |            | 0.25        | 0.4143 | 0.0021      | 0.5860 | 0.0011  | 1.0214 | 551.63       | 0.0153      | 0.0830      |
|            |            | 0.5         | 0.4209 | 0.0024      | 0.5797 | 0.0011  | 1.0127 | 625.68       | 0.0146      | 0.1754      |
|            |            | 0.75        | 0.4288 | 0.0019      | 0.5706 | 0.0012  | 0.9665 | 780.39       | 0.0132      | 0.4323      |



|             |            |      |        |        |        |        |        |         |        |         |
|-------------|------------|------|--------|--------|--------|--------|--------|---------|--------|---------|
|             |            | 1    | 0.4744 | 0.0020 | 0.5343 | 0.0010 | 0.9098 | 1006.67 | 0.0120 | 14.1491 |
| (0.25,0.25) | Lasso      | 0    | 0.1422 | 0.0017 | 0.8667 | 0.0016 | 1.2201 | 623.94  | 0.0169 | .       |
|             |            | 0.25 | 0.1398 | 0.0015 | 0.8673 | 0.0018 | 1.2330 | 607.62  | 0.0171 | .       |
|             |            | 0.5  | 0.1370 | 0.0016 | 0.8659 | 0.0019 | 1.2173 | 613.41  | 0.0170 | .       |
|             |            | 0.75 | 0.1410 | 0.0014 | 0.8684 | 0.0016 | 1.2347 | 614.65  | 0.0171 | .       |
|             |            | 1    | 0.1391 | 0.0017 | 0.8666 | 0.0017 | 1.2184 | 617.29  | 0.0170 | .       |
|             | Lasso+CTPR | 0    | 0.1422 | 0.0017 | 0.8669 | 0.0016 | 1.2234 | 634.05  | 0.0168 | 0.0105  |
|             |            | 0.25 | 0.1416 | 0.0014 | 0.8674 | 0.0018 | 1.2857 | 834.44  | 0.0151 | 0.2426  |
|             |            | 0.5  | 0.1476 | 0.0015 | 0.8610 | 0.0019 | 1.3530 | 1020.46 | 0.0139 | 0.7403  |
|             |            | 0.75 | 0.1656 | 0.0014 | 0.8532 | 0.0014 | 1.4217 | 1027.74 | 0.0142 | 2.0555  |
|             |            | 1    | 0.1845 | 0.0016 | 0.8333 | 0.0016 | 1.4329 | 1011.76 | 0.0146 | 10.7929 |
|             | MCP        | 0    | 0.1354 | 0.0017 | 0.8692 | 0.0016 | 1.0181 | 296.6   | 0.0224 | .       |
|             |            | 0.25 | 0.1324 | 0.0016 | 0.8699 | 0.0019 | 1.0267 | 290.16  | 0.0225 | .       |
|             |            | 0.5  | 0.1298 | 0.0016 | 0.8690 | 0.0019 | 1.0184 | 291.45  | 0.0225 | .       |
|             |            | 0.75 | 0.1341 | 0.0015 | 0.8705 | 0.0016 | 1.0325 | 292.14  | 0.0225 | .       |
|             |            | 1    | 0.1321 | 0.0018 | 0.8693 | 0.0018 | 1.0228 | 288.63  | 0.0225 | .       |
|             | MCP+CTPR   | 0    | 0.1404 | 0.0017 | 0.8656 | 0.0016 | 1.1180 | 488.08  | 0.0188 | 0.2305  |
|             |            | 0.25 | 0.1439 | 0.0015 | 0.8599 | 0.0017 | 1.1170 | 622.25  | 0.0171 | 0.4170  |
|             |            | 0.5  | 0.1486 | 0.0015 | 0.8503 | 0.0019 | 1.0430 | 795.43  | 0.0155 | 0.8040  |
|             |            | 0.75 | 0.1679 | 0.0015 | 0.8363 | 0.0014 | 1.0063 | 978.12  | 0.0144 | 2.3758  |
|             |            | 1    | 0.1883 | 0.0016 | 0.8128 | 0.0015 | 0.9945 | 1003.44 | 0.0144 | 15.6816 |
| (0.75,0.75) | Lasso      | 0    | 0.7010 | 0.0017 | 0.3113 | 0.0007 | 1.1503 | 1059.97 | 0.0081 | .       |
|             |            | 0.25 | 0.6998 | 0.0012 | 0.3129 | 0.0007 | 1.1560 | 1060.04 | 0.0081 | .       |
|             |            | 0.5  | 0.7008 | 0.0016 | 0.3126 | 0.0007 | 1.1534 | 1060.48 | 0.0081 | .       |
|             |            | 0.75 | 0.7028 | 0.0015 | 0.3114 | 0.0006 | 1.1537 | 1060.73 | 0.0081 | .       |
|             |            | 1    | 0.6976 | 0.0016 | 0.3120 | 0.0008 | 1.1540 | 1061.39 | 0.0081 | .       |
|             | Lasso+CTPR | 0    | 0.7010 | 0.0017 | 0.3113 | 0.0007 | 1.1503 | 1059.97 | 0.0081 | 0.0000  |
|             |            | 0.25 | 0.6998 | 0.0012 | 0.3129 | 0.0007 | 1.1560 | 1060.04 | 0.0081 | 0.0000  |
|             |            | 0.5  | 0.7008 | 0.0016 | 0.3126 | 0.0007 | 1.1534 | 1060.48 | 0.0081 | 0.0000  |
|             |            | 0.75 | 0.7047 | 0.0014 | 0.3119 | 0.0007 | 1.1690 | 1070.13 | 0.0081 | 0.0439  |
|             |            | 1    | 0.7187 | 0.0015 | 0.2986 | 0.0007 | 1.2004 | 1031.67 | 0.0091 | 8.1278  |
|             | MCP        | 0    | 0.7099 | 0.0017 | 0.2905 | 0.0006 | 0.9856 | 548.08  | 0.0116 | .       |
|             |            | 0.25 | 0.7086 | 0.0013 | 0.2913 | 0.0007 | 0.9904 | 541.48  | 0.0116 | .       |
|             |            | 0.5  | 0.7099 | 0.0016 | 0.2912 | 0.0006 | 0.9871 | 550.16  | 0.0115 | .       |
|             |            | 0.75 | 0.7119 | 0.0014 | 0.2898 | 0.0006 | 0.9881 | 549.3   | 0.0116 | .       |
|             |            | 1    | 0.7067 | 0.0016 | 0.2908 | 0.0006 | 0.9867 | 551.42  | 0.0115 | .       |
|             | MCP+CTPR   | 0    | 0.7099 | 0.0017 | 0.2905 | 0.0006 | 0.9856 | 548.08  | 0.0116 | 0.0000  |
|             |            | 0.25 | 0.7085 | 0.0013 | 0.2916 | 0.0007 | 1.0016 | 556.67  | 0.0115 | 0.0171  |
|             |            | 0.5  | 0.7109 | 0.0016 | 0.2902 | 0.0006 | 1.0148 | 594.6   | 0.0111 | 0.0593  |
|             |            | 0.75 | 0.7156 | 0.0014 | 0.2862 | 0.0005 | 1.0159 | 636.86  | 0.0107 | 0.1322  |
|             |            | 1    | 0.7296 | 0.0015 | 0.2679 | 0.0005 | 0.9978 | 1011.54 | 0.0087 | 14.6516 |

Supplementary Table 5. Prediction  $R^2$  and mean squared error (MSE) with  $\rho_{ij} = 0.1, 0.5, 0.7$  or  $0.9$  ( $i \neq j$ ,  $i \neq 1, j \neq 1$ ),  $\rho_{1i} = \rho_{i1} = 0.5$ , 5,000 SNPs, 500 causal SNPs, and, 100 replicates and 2-7 traits.

| $\rho_{ij}$ | # Traits   | Method     | $R^2$  | SE( $R^2$ ) | MSE    | SE(MSE) | Slope   | # Nz $\beta$ | $\lambda_1$ | $\lambda_2$ |
|-------------|------------|------------|--------|-------------|--------|---------|---------|--------------|-------------|-------------|
| 0.1         | 2          | Lasso      | 0.1782 | 0.0025      | 0.8253 | 0.0027  | 1.1712  | 414.32       | 0.0306      | .           |
|             |            | Lasso+CTPR | 0.2203 | 0.0024      | 0.7888 | 0.0023  | 1.2645  | 1122.45      | 0.0194      | 1.2979      |
|             |            | MCP        | 0.1475 | 0.0026      | 0.8529 | 0.0029  | 1.0503  | 146.22       | 0.0452      | .           |
|             | 3          | MCP+CTPR   | 0.2158 | 0.0026      | 0.7840 | 0.0024  | 1.0018  | 677.47       | 0.0254      | 1.4357      |
|             |            | Lasso      | 0.1800 | 0.0023      | 0.8287 | 0.0025  | 1.1603  | 426.46       | 0.0301      | .           |
|             |            | Lasso+CTPR | 0.2344 | 0.0020      | 0.7912 | 0.0021  | 1.4238  | 1128.37      | 0.0193      | 0.5149      |
|             | 4          | MCP        | 0.1485 | 0.0024      | 0.8575 | 0.0029  | 1.0423  | 147.68       | 0.0451      | .           |
|             |            | MCP+CTPR   | 0.2551 | 0.0021      | 0.7498 | 0.0021  | 1.0337  | 1111.64      | 0.0185      | 0.6822      |
|             |            | Lasso      | 0.1838 | 0.0024      | 0.8238 | 0.0028  | 1.1560  | 433.99       | 0.0299      | .           |
|             | 5          | Lasso+CTPR | 0.2379 | 0.0022      | 0.7889 | 0.0024  | 1.4512  | 1134.17      | 0.0189      | 0.2979      |
|             |            | MCP        | 0.1536 | 0.0027      | 0.8512 | 0.0033  | 1.0318  | 153.17       | 0.0445      | .           |
|             |            | MCP+CTPR   | 0.2739 | 0.0023      | 0.7328 | 0.0021  | 1.1061  | 1148.66      | 0.0173      | 0.3557      |
|             | 6          | Lasso      | 0.1793 | 0.0023      | 0.8227 | 0.0023  | 1.1769  | 416.08       | 0.0304      | .           |
|             |            | Lasso+CTPR | 0.2332 | 0.0020      | 0.7895 | 0.0021  | 1.4858  | 1132.49      | 0.0190      | 0.2206      |
|             |            | MCP        | 0.1472 | 0.0024      | 0.8516 | 0.0026  | 1.0690  | 142.42       | 0.0454      | .           |
|             | 7          | MCP+CTPR   | 0.2761 | 0.0022      | 0.7272 | 0.0020  | 1.1622  | 1160.75      | 0.0170      | 0.2516      |
|             |            | Lasso      | 0.1827 | 0.0020      | 0.8256 | 0.0027  | 1.1614  | 433.79       | 0.0296      | .           |
|             |            | Lasso+CTPR | 0.2347 | 0.0020      | 0.7917 | 0.0024  | 1.4417  | 1135.8       | 0.0185      | 0.1550      |
|             | 8          | MCP        | 0.1510 | 0.0024      | 0.8546 | 0.0032  | 1.0468  | 151.54       | 0.0446      | .           |
|             |            | MCP+CTPR   | 0.2818 | 0.0022      | 0.7274 | 0.0020  | 1.1320  | 1179.28      | 0.0159      | 0.1733      |
|             |            | Lasso      | 0.1822 | 0.0024      | 0.8276 | 0.0025  | 1.1738  | 423.6        | 0.0303      | .           |
| 9           | Lasso+CTPR | 0.2370     | 0.0020 | 0.7934      | 0.0022 | 1.4813  | 1129.65 | 0.0189       | 0.1345      |             |
|             | MCP        | 0.1489     | 0.0025 | 0.8581      | 0.0028 | 1.0592  | 145.75  | 0.0455       | .           |             |
|             | MCP+CTPR   | 0.2858     | 0.0022 | 0.7241      | 0.0017 | 1.1592  | 1169.61 | 0.0162       | 0.1392      |             |
| 0.5         | 2          | Lasso      | 0.1813 | 0.0024      | 0.8248 | 0.0028  | 1.1608  | 428.74       | 0.0300      | .           |
|             |            | Lasso+CTPR | 0.2245 | 0.0020      | 0.7885 | 0.0022  | 1.2783  | 1114.28      | 0.0195      | 1.2849      |
|             |            | MCP        | 0.1500 | 0.0026      | 0.8535 | 0.0029  | 1.0420  | 149.52       | 0.0450      | .           |
|             | 3          | MCP+CTPR   | 0.2209 | 0.0022      | 0.7822 | 0.0022  | 1.0071  | 672.39       | 0.0254      | 1.1759      |
|             |            | Lasso      | 0.1830 | 0.0021      | 0.8278 | 0.0028  | 1.1977  | 412.88       | 0.0307      | .           |
|             |            | Lasso+CTPR | 0.2363 | 0.0018      | 0.7902 | 0.0024  | 1.4284  | 1127.27      | 0.0196      | 0.5745      |
|             | 4          | MCP        | 0.1525 | 0.0023      | 0.8549 | 0.0032  | 1.0808  | 146.39       | 0.0451      | .           |
|             |            | MCP+CTPR   | 0.2476 | 0.0021      | 0.7578 | 0.0021  | 0.9990  | 1069.8       | 0.0192      | 0.6893      |
|             |            | Lasso      | 0.1826 | 0.0026      | 0.8233 | 0.0024  | 1.1485  | 442.14       | 0.0297      | .           |
|             | 5          | Lasso+CTPR | 0.2382 | 0.0023      | 0.7848 | 0.0020  | 1.4183  | 1129.48      | 0.0192      | 0.3174      |
|             |            | MCP        | 0.1512 | 0.0028      | 0.8524 | 0.0028  | 1.0451  | 153.75       | 0.0449      | .           |
|             |            | MCP+CTPR   | 0.2615 | 0.0025      | 0.7411 | 0.0017  | 1.0252  | 1133.33      | 0.0180      | 0.3905      |
|             | 6          | Lasso      | 0.1807 | 0.0023      | 0.8274 | 0.0027  | 1.1646  | 426.18       | 0.0302      | .           |
|             |            | Lasso+CTPR | 0.2389 | 0.0020      | 0.7893 | 0.0022  | 1.4694  | 1124.87      | 0.0194      | 0.2440      |
|             |            | MCP        | 0.1507 | 0.0025      | 0.8550 | 0.0032  | 1.0517  | 150.64       | 0.0449      | .           |
|             | 7          | MCP+CTPR   | 0.2656 | 0.0022      | 0.7391 | 0.0020  | 1.0546  | 1142.12      | 0.0177      | 0.2688      |
|             |            | Lasso      | 0.1780 | 0.0023      | 0.8242 | 0.0025  | 1.1878  | 412.33       | 0.0307      | .           |
|             |            | Lasso+CTPR | 0.2324 | 0.0023      | 0.7890 | 0.0023  | 1.4697  | 1127.47      | 0.0193      | 0.1884      |
|             | 8          | MCP        | 0.1460 | 0.0027      | 0.8524 | 0.0030  | 1.0706  | 142.77       | 0.0454      | .           |
|             |            | MCP+CTPR   | 0.2597 | 0.0024      | 0.7404 | 0.0021  | 1.0920  | 1139.85      | 0.0179      | 0.2223      |
|             |            | Lasso      | 0.1827 | 0.0022      | 0.8275 | 0.0026  | 1.1849  | 423.66       | 0.0303      | .           |
| 9           | Lasso+CTPR | 0.2399     | 0.0020 | 0.7910      | 0.0023 | 1.4892  | 1124.5  | 0.0193       | 0.1565      |             |

|     |   |            |        |        |        |        |        |         |        |        |
|-----|---|------------|--------|--------|--------|--------|--------|---------|--------|--------|
|     |   | MCP        | 0.1499 | 0.0022 | 0.8570 | 0.0030 | 1.0764 | 144.62  | 0.0454 | .      |
|     |   | MCP+CTPR   | 0.2702 | 0.0022 | 0.7355 | 0.0020 | 1.0545 | 1153.38 | 0.0168 | 0.1537 |
| 0.7 | 2 | Lasso      | 0.1812 | 0.0026 | 0.8256 | 0.0029 | 1.1706 | 421.21  | 0.0303 | .      |
|     |   | Lasso+CTPR | 0.2245 | 0.0024 | 0.7884 | 0.0024 | 1.2742 | 1118.59 | 0.0195 | 1.3595 |
|     |   | MCP        | 0.1495 | 0.0026 | 0.8544 | 0.0034 | 1.0513 | 145.83  | 0.0453 | .      |
|     |   | MCP+CTPR   | 0.2201 | 0.0025 | 0.7830 | 0.0024 | 1.0011 | 677.73  | 0.0253 | 1.2386 |
|     | 3 | Lasso      | 0.1821 | 0.0025 | 0.8266 | 0.0025 | 1.1806 | 422.93  | 0.0303 | .      |
|     |   | Lasso+CTPR | 0.2346 | 0.0021 | 0.7894 | 0.0022 | 1.4169 | 1113.13 | 0.0199 | 0.6074 |
|     |   | MCP        | 0.1517 | 0.0027 | 0.8536 | 0.0027 | 1.0691 | 147.19  | 0.0452 | .      |
|     |   | MCP+CTPR   | 0.2420 | 0.0022 | 0.7622 | 0.0021 | 0.9801 | 1032.51 | 0.0199 | 0.6968 |
|     | 4 | Lasso      | 0.1813 | 0.0023 | 0.8248 | 0.0027 | 1.1659 | 429.53  | 0.0300 | .      |
|     |   | Lasso+CTPR | 0.2365 | 0.0020 | 0.7855 | 0.0023 | 1.4101 | 1132.89 | 0.0193 | 0.3398 |
|     |   | MCP        | 0.1517 | 0.0025 | 0.8516 | 0.0031 | 1.0611 | 147.94  | 0.0450 | .      |
|     |   | MCP+CTPR   | 0.2512 | 0.0022 | 0.7513 | 0.0020 | 0.9836 | 1110.69 | 0.0184 | 0.3925 |
|     | 5 | Lasso      | 0.1800 | 0.0027 | 0.8245 | 0.0027 | 1.1652 | 432.27  | 0.0299 | .      |
|     |   | Lasso+CTPR | 0.2357 | 0.0024 | 0.7858 | 0.0022 | 1.4263 | 1125.03 | 0.0192 | 0.2387 |
|     |   | MCP        | 0.1504 | 0.0028 | 0.8513 | 0.0030 | 1.0627 | 149.89  | 0.0448 | .      |
|     |   | MCP+CTPR   | 0.2541 | 0.0027 | 0.7465 | 0.0020 | 0.9989 | 1124.65 | 0.0179 | 0.2702 |
|     | 6 | Lasso      | 0.1772 | 0.0029 | 0.8239 | 0.0028 | 1.1754 | 416.79  | 0.0305 | .      |
|     |   | Lasso+CTPR | 0.2352 | 0.0025 | 0.7845 | 0.0025 | 1.4506 | 1119.91 | 0.0195 | 0.2001 |
|     |   | MCP        | 0.1459 | 0.0029 | 0.8520 | 0.0033 | 1.0625 | 146.38  | 0.0452 | .      |
|     |   | MCP+CTPR   | 0.2530 | 0.0027 | 0.7449 | 0.0021 | 1.0183 | 1122.78 | 0.0181 | 0.2202 |
|     | 7 | Lasso      | 0.1784 | 0.0024 | 0.8259 | 0.0026 | 1.1671 | 423.78  | 0.0303 | .      |
|     |   | Lasso+CTPR | 0.2351 | 0.0021 | 0.7872 | 0.0022 | 1.4436 | 1124.07 | 0.0194 | 0.1583 |
|     |   | MCP        | 0.1475 | 0.0026 | 0.8540 | 0.0030 | 1.0534 | 148.5   | 0.0451 | .      |
|     |   | MCP+CTPR   | 0.2553 | 0.0024 | 0.7455 | 0.0019 | 1.0022 | 1140.85 | 0.0175 | 0.1671 |
| 0.9 | 2 | Lasso      | 0.1799 | 0.0025 | 0.8257 | 0.0025 | 1.1798 | 419.93  | 0.0305 | .      |
|     |   | Lasso+CTPR | 0.2210 | 0.0023 | 0.7907 | 0.0021 | 1.2821 | 1122.21 | 0.0197 | 1.3852 |
|     |   | MCP        | 0.1496 | 0.0028 | 0.8529 | 0.0030 | 1.0771 | 144.4   | 0.0455 | .      |
|     |   | MCP+CTPR   | 0.2154 | 0.0024 | 0.7859 | 0.0021 | 1.0001 | 690.86  | 0.0255 | 1.3393 |
|     | 3 | Lasso      | 0.1800 | 0.0024 | 0.8267 | 0.0027 | 1.1682 | 422.21  | 0.0303 | .      |
|     |   | Lasso+CTPR | 0.2322 | 0.0020 | 0.7868 | 0.0025 | 1.3618 | 1126.88 | 0.0195 | 0.5617 |
|     |   | MCP        | 0.1477 | 0.0025 | 0.8563 | 0.0030 | 1.0554 | 146.89  | 0.0451 | .      |
|     |   | MCP+CTPR   | 0.2386 | 0.0022 | 0.7645 | 0.0024 | 0.9618 | 975.14  | 0.0205 | 0.6178 |
|     | 4 | Lasso      | 0.1787 | 0.0026 | 0.8234 | 0.0029 | 1.1484 | 437.77  | 0.0298 | .      |
|     |   | Lasso+CTPR | 0.2312 | 0.0023 | 0.7849 | 0.0027 | 1.3753 | 1127.32 | 0.0194 | 0.3387 |
|     |   | MCP        | 0.1464 | 0.0027 | 0.8536 | 0.0034 | 1.0455 | 148.23  | 0.0452 | .      |
|     |   | MCP+CTPR   | 0.2392 | 0.0026 | 0.7606 | 0.0024 | 0.9559 | 1059.43 | 0.0193 | 0.3833 |
|     | 5 | Lasso      | 0.1830 | 0.0024 | 0.8250 | 0.0026 | 1.1413 | 447.35  | 0.0293 | .      |
|     |   | Lasso+CTPR | 0.2325 | 0.0020 | 0.7885 | 0.0022 | 1.3626 | 1128.69 | 0.0192 | 0.2335 |
|     |   | MCP        | 0.1519 | 0.0026 | 0.8539 | 0.0029 | 1.0519 | 151.09  | 0.0449 | .      |
|     |   | MCP+CTPR   | 0.2440 | 0.0022 | 0.7617 | 0.0020 | 0.9490 | 1062.07 | 0.0187 | 0.2451 |
|     | 6 | Lasso      | 0.1866 | 0.0022 | 0.8255 | 0.0027 | 1.1708 | 442.24  | 0.0297 | .      |
|     |   | Lasso+CTPR | 0.2378 | 0.0019 | 0.7880 | 0.0023 | 1.3930 | 1127.75 | 0.0195 | 0.2001 |
|     |   | MCP        | 0.1548 | 0.0024 | 0.8544 | 0.0029 | 1.0704 | 148.9   | 0.0451 | .      |
|     |   | MCP+CTPR   | 0.2472 | 0.0023 | 0.7604 | 0.0021 | 0.9621 | 1056.2  | 0.0191 | 0.2084 |
|     | 7 | Lasso      | 0.1793 | 0.0028 | 0.8266 | 0.0027 | 1.1671 | 422.69  | 0.0303 | .      |
|     |   | Lasso+CTPR | 0.2344 | 0.0025 | 0.7868 | 0.0025 | 1.4033 | 1121.52 | 0.0195 | 0.1624 |
|     |   | MCP        | 0.1485 | 0.0027 | 0.8550 | 0.0032 | 1.0510 | 148.33  | 0.0450 | .      |

---

MCP+CTPR 0.2436 0.0028 0.7592 0.0023 0.9658 1057.94 0.0189 0.1661

Supplementary Table 6. Prediction  $R^2$  and mean squared error (MSE) using summary statistics computed with 7,400, 14,800 samples or true SNPs effects with 2 traits, 14,800 training samples, 5,000 SNPs and 500 causal SNPs.

| N (SS) | Method     | $\rho_{12}$ | $R^2$  | SE( $R^2$ ) | MSE    | SE(MSE) | Slope  | # Nz $\beta$ | $\lambda_1$ | $\lambda_2$ |
|--------|------------|-------------|--------|-------------|--------|---------|--------|--------------|-------------|-------------|
| 7400   | Lasso      | 0           | 0.4069 | 0.0021      | 0.6010 | 0.0013  | 1.1833 | 977.16       | 0.0115      | .           |
|        |            | 0.25        | 0.4055 | 0.0023      | 0.6029 | 0.0011  | 1.1836 | 972.74       | 0.0115      | .           |
|        |            | 0.5         | 0.4097 | 0.0020      | 0.6036 | 0.0014  | 1.1806 | 979.81       | 0.0114      | .           |
|        |            | 0.75        | 0.4045 | 0.0022      | 0.6022 | 0.0011  | 1.1833 | 987.78       | 0.0115      | .           |
|        |            | 1           | 0.4097 | 0.0019      | 0.6005 | 0.0012  | 1.1872 | 967.21       | 0.0116      | .           |
|        | Lasso+CTPR | 0           | 0.4069 | 0.0021      | 0.6010 | 0.0013  | 1.1833 | 977.16       | 0.0115      | 0.0000      |
|        |            | 0.25        | 0.4055 | 0.0023      | 0.6029 | 0.0011  | 1.1841 | 974.42       | 0.0115      | 0.0012      |
|        |            | 0.5         | 0.4131 | 0.0020      | 0.6029 | 0.0015  | 1.2083 | 1031.03      | 0.0113      | 0.0786      |
|        |            | 0.75        | 0.4168 | 0.0021      | 0.5925 | 0.0011  | 1.2071 | 1057.53      | 0.0120      | 0.2357      |
|        |            | 1           | 0.4430 | 0.0018      | 0.5657 | 0.0011  | 1.1632 | 1065.02      | 0.0153      | 0.6058      |
|        | MCP        | 0           | 0.4110 | 0.0022      | 0.5874 | 0.0013  | 0.9767 | 476.83       | 0.0164      | .           |
|        |            | 0.25        | 0.4095 | 0.0024      | 0.5895 | 0.0011  | 0.9753 | 478.21       | 0.0164      | .           |
|        |            | 0.5         | 0.4140 | 0.0021      | 0.5899 | 0.0014  | 0.9759 | 472.47       | 0.0164      | .           |
|        |            | 0.75        | 0.4086 | 0.0022      | 0.5886 | 0.0011  | 0.9760 | 481.61       | 0.0164      | .           |
|        |            | 1           | 0.4132 | 0.0020      | 0.5870 | 0.0011  | 0.9779 | 473.32       | 0.0164      | .           |
|        | MCP+CTPR   | 0           | 0.4109 | 0.0022      | 0.5875 | 0.0013  | 1.0098 | 519.79       | 0.0158      | 0.0385      |
|        |            | 0.25        | 0.4122 | 0.0024      | 0.5866 | 0.0011  | 1.0170 | 538.53       | 0.0156      | 0.0627      |
|        |            | 0.5         | 0.4205 | 0.0021      | 0.5833 | 0.0014  | 1.0226 | 588.27       | 0.0152      | 0.1283      |
|        |            | 0.75        | 0.4233 | 0.0021      | 0.5739 | 0.0010  | 1.0164 | 639.02       | 0.0155      | 0.2374      |
|        |            | 1           | 0.4472 | 0.0018      | 0.5528 | 0.0011  | 1.0065 | 728.85       | 0.0183      | 0.5912      |
| 14800  | Lasso      | 0           | 0.4069 | 0.0021      | 0.6010 | 0.0013  | 1.1833 | 977.16       | 0.0115      | .           |
|        |            | 0.25        | 0.4055 | 0.0023      | 0.6029 | 0.0011  | 1.1836 | 972.74       | 0.0115      | .           |
|        |            | 0.5         | 0.4097 | 0.0020      | 0.6036 | 0.0014  | 1.1806 | 979.81       | 0.0114      | .           |
|        |            | 0.75        | 0.4045 | 0.0022      | 0.6022 | 0.0011  | 1.1833 | 987.78       | 0.0115      | .           |
|        |            | 1           | 0.4097 | 0.0019      | 0.6005 | 0.0012  | 1.1872 | 967.21       | 0.0116      | .           |
|        | Lasso+CTPR | 0           | 0.4069 | 0.0021      | 0.6010 | 0.0013  | 1.1833 | 977.16       | 0.0115      | 0.0000      |
|        |            | 0.25        | 0.4055 | 0.0023      | 0.6029 | 0.0011  | 1.1836 | 972.74       | 0.0115      | 0.0000      |
|        |            | 0.5         | 0.4129 | 0.0020      | 0.6039 | 0.0015  | 1.2157 | 1042.67      | 0.0113      | 0.0933      |
|        |            | 0.75        | 0.4171 | 0.0021      | 0.5939 | 0.0012  | 1.2246 | 1052.22      | 0.0124      | 0.3261      |
|        |            | 1           | 0.4508 | 0.0017      | 0.5582 | 0.0011  | 1.1637 | 1120.74      | 0.0211      | 1.4311      |
|        | MCP        | 0           | 0.4110 | 0.0022      | 0.5874 | 0.0013  | 0.9767 | 476.83       | 0.0164      | .           |
|        |            | 0.25        | 0.4095 | 0.0024      | 0.5895 | 0.0011  | 0.9753 | 478.21       | 0.0164      | .           |
|        |            | 0.5         | 0.4140 | 0.0021      | 0.5899 | 0.0014  | 0.9759 | 472.47       | 0.0164      | .           |
|        |            | 0.75        | 0.4086 | 0.0022      | 0.5886 | 0.0011  | 0.9760 | 481.61       | 0.0164      | .           |
|        |            | 1           | 0.4132 | 0.0020      | 0.5870 | 0.0011  | 0.9779 | 473.32       | 0.0164      | .           |
|        | MCP+CTPR   | 0           | 0.4115 | 0.0022      | 0.5869 | 0.0013  | 1.0156 | 527.95       | 0.0157      | 0.0446      |
|        |            | 0.25        | 0.4124 | 0.0024      | 0.5865 | 0.0011  | 1.0220 | 544.09       | 0.0155      | 0.0689      |
|        |            | 0.5         | 0.4217 | 0.0021      | 0.5824 | 0.0014  | 1.0330 | 596.67       | 0.0150      | 0.1426      |

|      |            |      |        |        |        |        |        |         |        |         |
|------|------------|------|--------|--------|--------|--------|--------|---------|--------|---------|
|      |            | 0.75 | 0.4257 | 0.0022 | 0.5718 | 0.0010 | 1.0292 | 676.5   | 0.0150 | 0.2974  |
|      |            | 1    | 0.4579 | 0.0018 | 0.5425 | 0.0010 | 1.0314 | 847.53  | 0.0196 | 1.0414  |
| True | Lasso      | 0    | 0.4069 | 0.0021 | 0.6010 | 0.0013 | 1.1833 | 977.16  | 0.0115 | .       |
|      |            | 0.25 | 0.4055 | 0.0023 | 0.6029 | 0.0011 | 1.1836 | 972.74  | 0.0115 | .       |
|      |            | 0.5  | 0.4097 | 0.0020 | 0.6036 | 0.0014 | 1.1806 | 979.81  | 0.0114 | .       |
|      |            | 0.75 | 0.4045 | 0.0022 | 0.6022 | 0.0011 | 1.1833 | 987.78  | 0.0115 | .       |
|      |            | 1    | 0.4097 | 0.0019 | 0.6005 | 0.0012 | 1.1872 | 967.21  | 0.0116 | .       |
|      | Lasso+CTPR | 0    | 0.4069 | 0.0021 | 0.6010 | 0.0013 | 1.1833 | 977.16  | 0.0115 | 0.0000  |
|      |            | 0.25 | 0.4056 | 0.0023 | 0.6029 | 0.0011 | 1.1845 | 976.84  | 0.0115 | 0.0024  |
|      |            | 0.5  | 0.4158 | 0.0020 | 0.6022 | 0.0014 | 1.2274 | 1044.35 | 0.0113 | 0.1386  |
|      |            | 0.75 | 0.4253 | 0.0021 | 0.5832 | 0.0011 | 1.1961 | 1032.38 | 0.0119 | 0.5277  |
|      |            | 1    | 0.5023 | 0.0018 | 0.4978 | 0.0010 | 1.0145 | 882.68  | 0.0144 | 24.1400 |
|      | MCP        | 0    | 0.4110 | 0.0022 | 0.5874 | 0.0013 | 0.9767 | 476.83  | 0.0164 | .       |
|      |            | 0.25 | 0.4095 | 0.0024 | 0.5895 | 0.0011 | 0.9753 | 478.21  | 0.0164 | .       |
|      |            | 0.5  | 0.4140 | 0.0021 | 0.5899 | 0.0014 | 0.9759 | 472.47  | 0.0164 | .       |
|      |            | 0.75 | 0.4086 | 0.0022 | 0.5886 | 0.0011 | 0.9760 | 481.61  | 0.0164 | .       |
|      |            | 1    | 0.4132 | 0.0020 | 0.5870 | 0.0011 | 0.9779 | 473.32  | 0.0164 | .       |
|      | MCP+CTPR   | 0    | 0.4115 | 0.0022 | 0.5870 | 0.0013 | 1.0194 | 531.48  | 0.0156 | 0.0489  |
|      |            | 0.25 | 0.4129 | 0.0024 | 0.5860 | 0.0011 | 1.0241 | 553.04  | 0.0154 | 0.0759  |
|      |            | 0.5  | 0.4234 | 0.0021 | 0.5807 | 0.0014 | 1.0341 | 606.61  | 0.0148 | 0.1650  |
|      |            | 0.75 | 0.4321 | 0.0021 | 0.5652 | 0.0010 | 1.0252 | 708.19  | 0.0142 | 0.3929  |
|      |            | 1    | 0.5023 | 0.0018 | 0.4977 | 0.0010 | 1.0045 | 818.36  | 0.0158 | 23.7300 |

Abbreviation: N(SS)=number of samples to generate summary statistics or true coefficients

**Supplementary Table 7. Information on UK Biobank, NHS/HPFS/PHS cohort datasets.**

| <b>Data</b>  | <b>#Samples</b> | <b>Phenotype</b>       | <b>Ethnicity</b> | <b>Genotype Platform</b>                                                | <b>Reference Panel</b>    |
|--------------|-----------------|------------------------|------------------|-------------------------------------------------------------------------|---------------------------|
| UK Biobank   | 456,837         | HGT,BMI<br>HIP,WST,WHR | European         | UK BiLEVE array<br>UK Biobank Axiom Array                               | UK10K+<br>1000Genomes Ph3 |
| NHS/HPFS/PHS | 20,769          | HGT,BMI                | European         | Affymatrix 6.0<br>Illumina HumanHap 550,610,660<br>Illumina OmniExpress | 1000Genomes Ph1           |

Supplementary Table 8. NHS/HPFS/PHS cohort data for simulation studies and real data analysis.

| Data       | Study       | Disease     | Platform       | N           | Total N |
|------------|-------------|-------------|----------------|-------------|---------|
| Affymetrix | NHS         | T2D         | Affymetrix 6.0 | 3285        | 8065    |
|            | HPFS        | T2D         | Affymetrix 6.0 | 2487        |         |
|            | NHS         | CHD         | Affymetrix 6.0 | 1146        |         |
|            | HPFS        | CHD         | Affymetrix 6.0 | 1147        |         |
| Illumina   | NHS         | Glaucoma    | Illumina 660   | 804         | 6787    |
|            | HPFS        | Glaucoma    | Illumina 660   | 472         |         |
|            | NHS         | KS          | Illumina 610   | 489         |         |
|            | NHS2        | KS          | Illumina 610   | 635         |         |
|            | HPFS        | KS          | Illumina 610   | 544         |         |
|            | NHS         | BrCa        | Illumina 550   | 2256        |         |
|            | NHS2        | BrCa        | Illumina 610   | 289         |         |
|            | HPFS        | AdvCap      | Illumina 610   | 394         |         |
|            | PHS         | AdvCap      | Illumina 610   | 540         |         |
|            | NHS         | Pancreas    | Illumina 550   | 162         |         |
|            | HPFS        | Pancreas    | Illumina 550   | 101         |         |
|            | PHS         | Pancreas    | Illumina 550   | 101         |         |
|            | OmniExpress | NHS         | GOUT           | OmniExpress |         |
| HPFS       |             | GOUT        | OmniExpress    | 1415        |         |
| NHS        |             | Colon       | OmniExpress    | 1165        |         |
| HPFS       |             | Colon       | OmniExpress    | 458         |         |
| PHS        |             | Colon       | OmniExpress    | 664         |         |
| NHS        |             | Endometrial | OmniExpress    | 726         |         |
| NHS        |             | MD          | OmniExpress    | 789         |         |
| Total      | 12 Studies  | 11 Diseases | 6 Platforms    | 20769       | 20769   |

Abbreviations: T2D=Type 2 Diabetes, CHD=Coronary Heart Disease, KS=Kidney Stone, BrCa=Breast Cancer, AdvCap=Advanced Cancer of the Prostate in Sweden, MD=Mammographic Density



Supplementary Table 9. Prediction R2 and mean squared error (MSE) computed with two different sample sizes (N=30K, 437K) using PRS, LDpred, MTAG, MTGBLUP and CTPR methods. We considered height (HGT) as a primary trait and body mass index (BMI) as a secondary trait and used NHS/HPFS/PHS cohort or UK Biobank data as a validation set separately.

| N        | Validation       | Primary | Second  | Data(2nd)   | Method     | R <sup>2</sup> | MSE      | Slope   |         |
|----------|------------------|---------|---------|-------------|------------|----------------|----------|---------|---------|
| 30K      | NHS/HPFS<br>/PHS | HGT     | x       | x           | PRS        | 0.0701         | 7364.63  | -0.0497 |         |
|          |                  |         |         |             | LDpred     | 0.0899         | 39.6256  | 5.0644  |         |
|          |                  |         |         | BMI         | UKB Stat   | STGBLUP        | 0.0862   | 36.4127 | 0.8483  |
|          |                  |         |         |             |            | MCP            | 0.0917   | 36.4183 | 0.7679  |
|          |                  |         |         |             |            | Lasso          | 0.1042   | 35.7461 | 0.8361  |
|          | UKB              | HGT     | x       | x           | PRS        | 0.0883         | 5225.09  | -0.0574 |         |
|          |                  |         |         |             | LDpred     | 0.1135         | 39.1111  | 5.8195  |         |
|          |                  |         |         | BMI         | UKB Stat   | STGBLUP        | 0.1142   | 35.3496 | 1.0360  |
|          |                  |         |         |             |            | MCP            | 0.1142   | 35.4198 | 0.8883  |
|          |                  |         |         |             |            | Lasso          | 0.1313   | 34.6628 | 0.9863  |
| UKB      | HGT              | x       | x       | PRS+MTAG    | 0.0883     | 5242.49        | -0.0572  |         |         |
|          |                  |         |         | LDpred+MTAG | 0.1129     | 39.18          | 6.1366   |         |         |
|          |                  |         | BMI     | UKB Ind     | MTGBLUP    | 0.1142         | 35.3490  | 1.0263  |         |
|          |                  |         |         |             | UKB Stat   | MCP+CTPR       | 0.1454   | 34.5195 | 1.3680  |
|          |                  |         |         |             |            | Lasso+CTPR     | 0.1458   | 34.5708 | 1.4057  |
| 437K     | NHS/HPFS<br>/PHS | HGT     | x       | x           | PRS        | 0.1427         | 666.85   | -0.1093 |         |
|          |                  |         |         |             | LDpred     | 0.2218         | 36.3075  | 4.5815  |         |
|          |                  |         |         | BMI         | UKB Stat   | MCP            | 0.2609   | 60.8012 | 0.8041  |
|          |                  |         |         |             |            | Lasso          | 0.2796   | 39.7619 | 1.0116  |
|          |                  |         |         |             |            | UKB Stat       | PRS+MTAG | 0.1412  | 686.60  |
|          | LDpred+MTAG      | 0.2226  | 36.9847 | 4.7896      |            |                |          |         |         |
|          | UKB              | HGT     | x       | x           | MCP+CTPR   | 0.2922         | 29.1754  | 1.0650  |         |
|          |                  |         |         |             | Lasso+CTPR | 0.2978         | 28.8956  | 1.0395  |         |
|          |                  |         |         | BMI         | UKB Stat   | PRS            | 0.2233   | 763.11  | -0.1306 |
|          |                  |         |         |             |            | LDpred         | 0.3654   | 35.5245 | 5.3223  |
| UKB Stat |                  |         |         |             |            | MCP            | 0.3776   | 25.0103 | 0.9397  |
|          | Lasso            | 0.3908  | 24.7200 | 1.1614      |            |                |          |         |         |
| UKB      | HGT              | x       | x       | PRS+MTAG    | 0.2220     | 753.55         | -0.1296  |         |         |
|          |                  |         |         | LDpred+MTAG | 0.3584     | 36.4958        | 5.7383   |         |         |
|          |                  |         | BMI     | UKB Stat    | MCP+CTPR   | 0.4248         | 24.0173  | 1.0331  |         |
|          |                  |         |         |             | Lasso+CTPR | 0.4284         | 23.2622  | 1.0276  |         |

Abbreviations: UKB=UK Biobank, UKB Stat=Summary statistics in UK Biobank, UKB Ind=Individual-level data in UK Biobank

Supplementary Table 10. Prediction R<sup>2</sup> and mean squared error (MSE) using PRS, LDpred, MTAG, MTGBLUP and CTPR methods. We considered height (HGT) as a primary trait and hip circumference (HIP), waist circumference (WST) and waist-hip ratio (WHR) as a secondary trait and used NHS/HPFS/PHS cohort or UK Biobank data as a validation set separately.

| N   | Validation         | Primary  | Second      | Data(2nd)   | Method      | R2       | MSE      | Slope   |
|-----|--------------------|----------|-------------|-------------|-------------|----------|----------|---------|
| 30K | NHS/HPFS<br>/PHS   | HGT      | HIP         | UKB Stat    | PRS+MTAG    | 0.0704   | 7326.08  | -0.0497 |
|     |                    |          |             |             | LDpred+MTAG | 0.0898   | 39.5744  | 5.3455  |
|     |                    |          |             | UKB Ind     | MTGBLUP     | 0.0847   | 36.5702  | 0.8011  |
|     |                    |          |             | UKB Stat    | MCP+CTPR    | 0.1031   | 35.7451  | 1.1985  |
|     |                    | WST      | UKB Stat    | PRS+MTAG    | 0.0702      | 7372.483 | -0.0496  |         |
|     |                    |          |             | LDpred+MTAG | 0.0894      | 39.593   | 5.3389   |         |
|     |                    |          | UKB Ind     | MTGBLUP     | 0.0863      | 36.4306  | 0.8353   |         |
|     |                    |          | UKB Stat    | MCP+CTPR    | 0.1048      | 35.8116  | 1.3233   |         |
|     | WHR                | UKB Stat | PRS+MTAG    | 0.0700      | 7352.241    | -0.0496  |          |         |
|     |                    |          | LDpred+MTAG | 0.0893      | 39.5258     | 5.3287   |          |         |
|     |                    | UKB Ind  | MTGBLUP     | 0.0855      | 36.4448     | 0.8439   |          |         |
|     |                    | UKB Stat | MCP+CTPR    | 0.1052      | 35.7934     | 1.3192   |          |         |
|     | BMI/HIP<br>WST/WHR | UKB Stat | PRS+MTAG    | 0.0687      | 7424.239    | -0.0492  |          |         |
|     |                    |          | LDpred+MTAG | 0.0878      | 39.6229     | 5.2641   |          |         |
|     |                    | UKB Ind  | MTGBLUP     | 0.0862      | 36.4313     | 0.8354   |          |         |
|     |                    | UKB Stat | MCP+CTPR    | 0.1131      | 35.2955     | 1.1325   |          |         |
| 30K | UKB                | HGT      | HIP         | UKB Stat    | PRS+MTAG    | 0.0883   | 5196.228 | -0.0573 |
|     |                    |          |             |             | LDpred+MTAG | 0.1125   | 39.1414  | 6.1236  |
|     |                    |          |             | UKB Ind     | MTGBLUP     | 0.1094   | 35.5446  | 0.9584  |
|     |                    |          |             | UKB Stat    | MCP+CTPR    | 0.1307   | 35.1600  | 1.4308  |
|     |                    | WST      | UKB Stat    | PRS+MTAG    | 0.0883      | 5233.249 | -0.0573  |         |
|     |                    |          |             | LDpred+MTAG | 0.1128      | 39.1812  | 6.1306   |         |
|     |                    |          | UKB Ind     | MTGBLUP     | 0.1126      | 35.4110  | 1.0090   |         |
|     |                    |          | UKB Stat    | MCP+CTPR    | 0.1344      | 35.2894  | 1.5963   |         |
|     | WHR                | UKB Stat | PRS+MTAG    | 0.0884      | 5186.579    | -0.0573  |          |         |
|     |                    |          | LDpred+MTAG | 0.0983      | 39.5567     | 5.4920   |          |         |
|     |                    | UKB Ind  | MTGBLUP     | 0.1141      | 35.3553     | 1.0333   |          |         |
|     |                    | UKB Stat | MCP+CTPR    | 0.1346      | 35.2726     | 1.5898   |          |         |
|     | BMI/HIP<br>WST/WHR | UKB Stat | PRS+MTAG    | 0.0876      | 5183.02     | -0.0570  |          |         |
|     |                    |          | LDpred+MTAG | 0.1119      | 39.1691     | 6.0686   |          |         |
|     |                    | UKB Ind  | MTGBLUP     | 0.1141      | 35.3553     | 1.0333   |          |         |
|     |                    | UKB Stat | MCP+CTPR    | 0.1346      | 35.2726     | 1.5898   |          |         |

|          |            |        |         |        |
|----------|------------|--------|---------|--------|
| UKB Ind  | MTGBLUP    | 0.1140 | 35.3543 | 1.0331 |
| UKB Stat | MCP+CTPR   | 0.1471 | 34.4871 | 1.3850 |
|          | Lasso+CTPR | 0.1474 | 34.5407 | 1.4233 |

---

Supplementary Table 11. Prediction  $R^2$  and mean squared error (MSE) with different sample sizes (N=30K,200K,437K) and number of traits (T=2,3,4) using PRS, LDpred, MTAG, MTGBLUP and CTPR methods when genetic correlation between two traits=0.15.

| N    | #Traits | $\rho$ | Method      | $R^2$  | MSE      | Slope   |
|------|---------|--------|-------------|--------|----------|---------|
| 30K  | 2       | 0.15   | PRS         | 0.0914 | 8154.01  | -0.0094 |
|      |         |        | LDpred      | 0.1076 | 1.4363   | 0.9077  |
|      |         |        | STGBLUP     | 0.1043 | 0.8869   | 0.9854  |
|      |         |        | MCP         | 0.1145 | 0.8867   | 0.9812  |
|      |         |        | LAS         | 0.1235 | 0.8878   | 1.4261  |
|      |         |        | PRS+MTAG    | 0.0924 | 25428.78 | -0.0088 |
|      |         |        | LDpred+MTAG | 0.1089 | 3.0516   | 0.8644  |
|      |         |        | MTGBLUP     | 0.1052 | 0.8858   | 0.9902  |
|      |         |        | MCP+CTPR    | 0.1294 | 0.8737   | 1.44249 |
|      |         |        | LAS+CTPR    | 0.1420 | 0.8560   | 1.28018 |
| 30K  | 3       | 0.15   | PRS         | 0.0914 | 8154.01  | -0.0094 |
|      |         |        | LDpred      | 0.1076 | 1.4363   | 0.9077  |
|      |         |        | STGBLUP     | 0.1043 | 0.8869   | 0.9854  |
|      |         |        | MCP         | 0.1145 | 0.8867   | 0.9812  |
|      |         |        | LAS         | 0.1235 | 0.8878   | 1.4261  |
|      |         |        | PRS+MTAG    | 0.0954 | 19464.81 | -0.0089 |
|      |         |        | LDpred+MTAG | 0.1118 | 2.2218   | 0.8582  |
|      |         |        | MTGBLUP     | 0.1088 | 0.8943   | 1.0044  |
|      |         |        | MCP+CTPR    | 0.1344 | 0.8659   | 1.3554  |
|      |         |        | LAS+CTPR    | 0.1472 | 0.8664   | 1.52160 |
| 30K  | 4       | 0.15   | PRS         | 0.0914 | 8154.01  | -0.0094 |
|      |         |        | LDpred      | 0.1076 | 1.4363   | 0.9077  |
|      |         |        | STGBLUP     | 0.1043 | 0.8869   | 0.9854  |
|      |         |        | MCP         | 0.1145 | 0.8867   | 0.9812  |
|      |         |        | LAS         | 0.1235 | 0.8878   | 1.4261  |
|      |         |        | PRS+MTAG    | 0.0979 | 19004.94 | -0.0089 |
|      |         |        | LDpred+MTAG | 0.1138 | 2.4579   | 0.8563  |
|      |         |        | MTGBLUP     | 0.1124 | 0.8636   | 1.0074  |
|      |         |        | MCP+CTPR    | 0.1380 | 0.8727   | 1.6093  |
|      |         |        | LAS+CTPR    | 0.1507 | 0.8749   | 1.7011  |
| 200K | 2       | 0.15   | PRS         | 0.1559 | 4129.56  | -0.0163 |
|      |         |        | LDpred      | 0.2435 | 2.5768   | 0.6544  |
|      |         |        | MCP         | 0.2842 | 0.7645   | 0.4763  |
|      |         |        | LAS         | 0.2913 | 0.7404   | 0.6059  |
|      |         |        | PRS+MTAG    | 0.1557 | 917.07   | -0.0159 |
|      |         |        | LDpred+MTAG | 0.2477 | 0.8001   | 1.1117  |
|      |         |        | MCP+CTPR    | 0.3049 | 0.7584   | 0.5494  |
|      |         |        | LAS+CTPR    | 0.3111 | 0.7396   | 0.6329  |

|      |   |      |             |        |          |         |
|------|---|------|-------------|--------|----------|---------|
| 437K | 2 | 0.15 | PRS         | 0.1902 | 3270.83  | -0.0179 |
|      |   |      | LDpred      | 0.3453 | 141.7601 | 0.1797  |
|      |   |      | MCP         | 0.3848 | 0.7292   | 0.5584  |
|      |   |      | LAS         | 0.3948 | 0.6948   | 0.6984  |
|      |   |      | PRS+MTAG    | 0.1928 | 633.16   | -0.0173 |
|      |   |      | LDpred+MTAG | 0.3476 | 0.8239   | 0.8867  |
|      |   |      | MCP+CTPR    | 0.4101 | 0.6998   | 0.6994  |
|      |   |      | LAS+CTPR    | 0.4112 | 0.6597   | 0.7991  |

**Supplementary Table 12. Prediction accuracy using only unrelated testing samples (N=13,685) and all testing samples (N=20,000) and subsampling p-values to check how related samples between training and testing sets from UK Biobank have impact on potential inflation of prediction accuracy.**

| <b>N</b> | <b>Validation</b> | <b>Primary</b> | <b>Second</b> | <b>Method</b> | <b>R<sup>2</sup> (All)</b> | <b>R<sup>2</sup> (Unrel)</b> | <b>P<sub>Diff</sub></b> |
|----------|-------------------|----------------|---------------|---------------|----------------------------|------------------------------|-------------------------|
| 30K      | NHS/HPFS<br>/PHS  | HGT            | x             | MCP           | 0.0917                     | 0.0912                       | 0.9820                  |
|          |                   |                |               | LAS           | 0.1042                     | 0.1038                       | 0.9500                  |
|          |                   |                | BMI           | MCP+CTPR      | 0.1132                     | 0.1122                       | 0.8980                  |
|          |                   |                |               | LAS+CTPR      | 0.1132                     | 0.1123                       | 0.9040                  |
|          | UKB               | HGT            | x             | MCP           | 0.1142                     | 0.1151                       | 0.8340                  |
|          |                   |                |               | LAS           | 0.1313                     | 0.1336                       | 0.6740                  |
|          |                   |                | BMI           | MCP+CTPR      | 0.1454                     | 0.1465                       | 0.8760                  |
|          |                   |                |               | LAS+CTPR      | 0.1458                     | 0.1467                       | 0.8960                  |
| 437K     | NHS/HPFS<br>/PHS  | HGT            | x             | MCP           | 0.2609                     | 0.2592                       | 0.8540                  |
|          |                   |                |               | LAS           | 0.2796                     | 0.2779                       | 0.8820                  |
|          |                   |                | BMI           | MCP+CTPR      | 0.2922                     | 0.2893                       | 0.7420                  |
|          |                   |                |               | LAS+CTPR      | 0.2978                     | 0.2944                       | 0.7020                  |
|          | UKBio             | HGT            | x             | MCP           | 0.3776                     | 0.3740                       | 0.6040                  |
|          |                   |                |               | LAS           | 0.3908                     | 0.3862                       | 0.5160                  |
|          |                   |                | BMI           | MCP+CTPR      | 0.4248                     | 0.4191                       | 0.4220                  |
|          |                   |                |               | LAS+CTPR      | 0.4284                     | 0.4234                       | 0.4800                  |

Abbreviations: R<sup>2</sup> (All): prediction accuracy using all testing samples, R<sup>2</sup> (Unrel): prediction accuracy using unrelated testing samples, P<sub>Diff</sub>: subsampling p-values for testing mean difference between R<sup>2</sup> (All) and R<sup>2</sup> (Unrel).

## References

1. Daetwyler, H.D., Villanueva, B. & Woolliams, J.A. Accuracy of predicting the genetic risk of disease using a genome-wide approach. *PLoS One* **3**, e3395 (2008).
2. Visscher, P.M., Yang, J. & Goddard, M.E. A commentary on 'common SNPs explain a large proportion of the heritability for human height' by Yang et al.(2010). *Twin Research and Human Genetics* **13**, 517-524 (2010).
